# Supplementary material
Source: publisher figshare collection journal article supplement (https://acs.figshare.com/ndownloader/files/3881020)
Supplement: Supplementary file 1 [file 3881020]

ATOM 1 N ALA 1	33.133 51.777 51.126 0.00 0.00	N
ATOM 2 H1 ALA 1	33.465 51.861 50.176 0.00 0.00	H
ATOM 3 H2 ALA 1	32.417 52.471 51.290 0.00 0.00	H
ATOM 4 H3 ALA 1	32.716 50.865 51.247 0.00 0.00	H
ATOM 5 CA ALA 1	34.252 51.949 52.065 0.00 0.00	C
ATOM 6 HA ALA 1	34.721 52.913 51.870 0.00 0.00	H
ATOM 7 CB ALA 1	33.776 51.931 53.524 0.00 0.00	C
ATOM 8 HB1 ALA 1	33.020 52.703 53.664 0.00 0.00	H
ATOM 9 HB2 ALA 1	33.364 50.953 53.773 0.00 0.00	H
ATOM 10 HB3 ALA 1	34.620 52.142 54.180 0.00 0.00	H
ATOM 11 C ALA 1	35.300 50.862 51.795 0.00 0.00	C
ATOM 12 O ALA 1	34.961 49.802 51.269 0.00 0.00	O
ATOM 13 N ASP 2	36.558 51.104 52.158 0.00 0.00	N
ATOM 14 H ASP 2	36.779 51.971 52.627 0.00 0.00	H
ATOM 15 CA ASP 2	37.669 50.176 51.937 0.00 0.00	C
ATOM 16 HA ASP 2	37.596 49.823 50.909 0.00 0.00	H
ATOM 17 CB ASP 2	39.010 50.920 52.052 0.00 0.00	C
ATOM 18 HB2 ASP 2	39.821 50.208 51.900 0.00 0.00	H
ATOM 19 HB3 ASP 2	39.077 51.637 51.234 0.00 0.00	H
ATOM 20 CG ASP 2	39.218 51.662 53.376 0.00 0.00	C
ATOM 21 OD1 ASP 2	40.170 51.351 54.125 0.00 0.00	O
ATOM 22 OD2 ASP 2	38.430 52.594 53.669 0.00 0.00	O
ATOM 23 C ASP 2	37.603 48.939 52.842 0.00 0.00	C
ATOM 24 O ASP 2	37.477 49.053 54.063 0.00 0.00	O
ATOM 25 N LEU 3	37.692 47.749 52.238 0.00 0.00	N
ATOM 26 H LEU 3	37.700 47.726 51.228 0.00 0.00	H
ATOM 27 CA LEU 3	37.716 46.456 52.930 0.00 0.00	C
ATOM 28 HA LEU 3	36.807 46.354 53.522 0.00 0.00	H
ATOM 29 CB LEU 3	37.805 45.329 51.884 0.00 0.00	C
ATOM 30 HB2 LEU 3	38.600 45.575 51.180 0.00 0.00	H
ATOM 31 HB3 LEU 3	38.092 44.405 52.385 0.00 0.00	H
ATOM 32 CG LEU 3	36.517 45.029 51.092 0.00 0.00	C
ATOM 33 HG LEU 3	36.082 45.966 50.743 0.00 0.00	H
ATOM 34 CD1 LEU 3	36.861 44.179 49.862 0.00 0.00	C
ATOM 35 1HD1 LEU 3	37.561 44.702 49.211 0.00 0.00	H
ATOM 36 2HD1 LEU 3	37.306 43.237 50.183 0.00 0.00	H
ATOM 37 3HD1 LEU 3	35.956 43.964 49.294 0.00 0.00	H
ATOM 38 CD2 LEU 3	35.485 44.292 51.961 0.00 0.00	C
ATOM 39 1HD2 LEU 3	35.219 44.884 52.837 0.00 0.00	H
ATOM 40 2HD2 LEU 3	34.588 44.103 51.371 0.00 0.00	H
ATOM 41 3HD2 LEU 3	35.894 43.338 52.292 0.00 0.00	H
ATOM 42 C LEU 3	38.897 46.340 53.898 0.00 0.00	C
ATOM 43 O LEU 3	38.761 45.704 54.938 0.00 0.00	O
ATOM 44 N TYR 4	40.042 46.938 53.557 0.00 0.00	N
ATOM 45 H TYR 4	40.040 47.471 52.699 0.00 0.00	H
ATOM 46 CA TYR 4	41.360 46.730 54.167 0.00 0.00	C
ATOM 47 HA TYR 4	41.285 46.937 55.235 0.00 0.00	H
ATOM 48 CB TYR 4	41.812 45.259 54.009 0.00 0.00	C
ATOM 49 HB2 TYR 4	42.895 45.195 54.110 0.00 0.00	H
ATOM 50 HB3 TYR 4	41.375 44.709 54.843 0.00 0.00	H
ATOM 51 CG TYR 4	41.418 44.558 52.725 0.00 0.00	C
ATOM 52 CD1 TYR 4	40.678 43.354 52.786 0.00 0.00	C
ATOM 53 HD1 TYR 4	40.387 42.951 53.746 0.00 0.00	H
ATOM 54 CE1 TYR 4	40.302 42.685 51.605 0.00 0.00	C
ATOM 55 HE1 TYR 4	39.720 41.776 51.653 0.00 0.00	H
ATOM 56 CZ TYR 4	40.677 43.220 50.359 0.00 0.00	C
ATOM 57 OH TYR 4	40.340 42.587 49.208 0.00 0.00	O
ATOM 58 HH TYR 4	39.873 41.762 49.358 0.00 0.00	H
ATOM 59 CE2 TYR 4	41.413 44.421 50.291 0.00 0.00	C
ATOM 60 HE2 TYR 4	41.709 44.816 49.330 0.00 0.00	H
ATOM 61 CD2 TYR 4	41.780 45.093 51.471 0.00 0.00	C
ATOM 62 HD2 TYR 4	42.354 46.005 51.409 0.00 0.00	H
ATOM 63 C TYR 4	42.385 47.730 53.610 0.00 0.00	C
ATOM 64 O TYR 4	42.143 48.369 52.587 0.00 0.00	O
ATOM 65 N GLU 5	43.523 47.881 54.286 0.00 0.00	N
ATOM 66 H GLU 5	43.660 47.325 55.118 0.00 0.00	H
ATOM 67 CA GLU 5	44.595 48.788 53.861 0.00 0.00	C
ATOM 68 HA GLU 5	44.147 49.743 53.587 0.00 0.00	H
ATOM 69 CB GLU 5	45.582 49.031 55.021 0.00 0.00	C
ATOM 70 HB2 GLU 5	46.101 48.097 55.236 0.00 0.00	H
ATOM 71 HB3 GLU 5	46.332 49.754 54.702 0.00 0.00	H
ATOM 72 CG GLU 5	44.959 49.542 56.330 0.00 0.00	C
ATOM 73 HG2 GLU 5	44.376 48.731 56.766 0.00 0.00	H
ATOM 74 HG3 GLU 5	45.764 49.778 57.026 0.00 0.00	H
ATOM 75 CD GLU 5	44.059 50.764 56.175 0.00 0.00	C
ATOM 76 OE1 GLU 5	44.227 51.576 55.235 0.00 0.00	O
ATOM 77 OE2 GLU 5	43.157 50.942 57.026 0.00 0.00	O
ATOM 78 C GLU 5	45.365 48.291 52.628 0.00 0.00	C
ATOM 79 O GLU 5	45.254 47.131 52.223 0.00 0.00	O
ATOM 80 N ASN 6	46.207 49.153 52.062 0.00 0.00	N
ATOM 81 H ASN 6	46.236 50.100 52.411 0.00 0.00	H
ATOM 82 CA ASN 6	47.160 48.811 51.001 0.00 0.00	C
ATOM 83 HA ASN 6	47.373 47.745 51.076 0.00 0.00	H
ATOM 84 CB ASN 6	46.539 49.065 49.623 0.00 0.00	C
ATOM 85 HB2 ASN 6	47.178 48.607 48.867 0.00 0.00	H
ATOM 86 HB3 ASN 6	45.559 48.588 49.586 0.00 0.00	H
ATOM 87 CG ASN 6	46.384 50.535 49.272 0.00 0.00	C
ATOM 88 OD1 ASN 6	47.238 51.110 48.615 0.00 0.00	O
ATOM 89 ND2 ASN 6	45.325 51.178 49.712 0.00 0.00	N
ATOM 90 1HD2 ASN 6	45.188 52.148 49.468 0.00 0.00	H
ATOM 91 2HD2 ASN 6	44.606 50.689 50.227 0.00 0.00	H
ATOM 92 C ASN 6	48.487 49.573 51.163 0.00 0.00	C
ATOM 93 O ASN 6	48.473 50.694 51.680 0.00 0.00	O
ATOM 94 N PRO 7	49.641 49.012 50.730 0.00 0.00	N
ATOM 95 CD PRO 7	49.809 47.730 50.065 0.00 0.00	C
ATOM 96 HD2 PRO 7	49.195 47.647 49.168 0.00 0.00	H
ATOM 97 HD3 PRO 7	49.573 46.930 50.766 0.00 0.00	H
ATOM 98 CG PRO 7	51.288 47.632 49.691 0.00 0.00	C
ATOM 99 HG2 PRO 7	51.466 48.093 48.720 0.00 0.00	H
ATOM 100 HG3 PRO 7	51.649 46.604 49.695 0.00 0.00	H
ATOM 101 CB PRO 7	51.956 48.464 50.781 0.00 0.00	C
ATOM 102 HB2 PRO 7	52.914 48.866 50.450 0.00 0.00	H
ATOM 103 HB3 PRO 7	52.101 47.845 51.667 0.00 0.00	H
ATOM 104 CA PRO 7	50.940 49.565 51.098 0.00 0.00	C
ATOM 105 HA PRO 7	50.952 49.748 52.173 0.00 0.00	H
ATOM 106 C PRO 7	51.247 50.899 50.395 0.00 0.00	C
ATOM 107 O PRO 7	51.886 51.749 51.011 0.00 0.00	O
ATOM 108 N MET 8	50.731 51.141 49.183 0.00 0.00	N
ATOM 109 H MET 8	50.241 50.402 48.698 0.00 0.00	H
ATOM 110 CA MET 8	50.836 52.446 48.510 0.00 0.00	C
ATOM 111 HA MET 8	51.866 52.797 48.585 0.00 0.00	H
ATOM 112 CB MET 8	50.482 52.260 47.025 0.00 0.00	C
ATOM 113 HB2 MET 8	49.520 51.754 46.950 0.00 0.00	H
ATOM 114 HB3 MET 8	50.383 53.240 46.559 0.00 0.00	H
ATOM 115 CG MET 8	51.557 51.449 46.281 0.00 0.00	C
ATOM 116 HG2 MET 8	51.753 50.532 46.837 0.00 0.00	H
ATOM 117 HG3 MET 8	51.155 51.152 45.312 0.00 0.00	H
ATOM 118 SD MET 8	53.120 52.314 46.017 0.00 0.00	S
ATOM 119 CE MET 8	52.638 53.320 44.603 0.00 0.00	C
ATOM 120 HE1 MET 8	53.485 53.947 44.325 0.00 0.00	H
ATOM 121 HE2 MET 8	52.367 52.669 43.772 0.00 0.00	H
ATOM 122 HE3 MET 8	51.794 53.957 44.867 0.00 0.00	H
ATOM 123 C MET 8	49.945 53.537 49.141 0.00 0.00	C
ATOM 124 O MET 8	50.168 54.728 48.904 0.00 0.00	O
ATOM 125 N GLY 9	48.949 53.160 49.955 0.00 0.00	N
ATOM 126 H GLY 9	48.833 52.171 50.123 0.00 0.00	H
ATOM 127 CA GLY 9	48.066 54.076 50.681 0.00 0.00	C
ATOM 128 HA2 GLY 9	47.638 53.538 51.527 0.00 0.00	H
ATOM 129 HA3 GLY 9	48.653 54.920 51.043 0.00 0.00	H
ATOM 130 C GLY 9	46.907 54.631 49.859 0.00 0.00	C
ATOM 131 O GLY 9	46.422 55.710 50.192 0.00 0.00	O
ATOM 132 N LEU 10	46.457 53.917 48.814 0.00 0.00	N
ATOM 133 H LEU 10	46.914 53.035 48.633 0.00 0.00	H
ATOM 134 CA LEU 10	45.400 54.336 47.883 0.00 0.00	C
ATOM 135 HA LEU 10	45.758 55.235 47.382 0.00 0.00	H
ATOM 136 CB LEU 10	45.247 53.258 46.783 0.00 0.00	C
ATOM 137 HB2 LEU 10	46.250 53.078 46.395 0.00 0.00	H
ATOM 138 HB3 LEU 10	44.902 52.322 47.222 0.00 0.00	H
ATOM 139 CG LEU 10	44.336 53.630 45.586 0.00 0.00	C
ATOM 140 HG LEU 10	44.408 54.699 45.383 0.00 0.00	H
ATOM 141 CD1 LEU 10	44.806 52.886 44.326 0.00 0.00	C
ATOM 142 1HD1 LEU 10	44.758 51.810 44.495 0.00 0.00	H
ATOM 143 2HD1 LEU 10	44.157 53.129 43.484 0.00 0.00	H
ATOM 144 3HD1 LEU 10	45.826 53.175 44.072 0.00 0.00	H
ATOM 145 CD2 LEU 10	42.858 53.275 45.837 0.00 0.00	C
ATOM 146 1HD2 LEU 10	42.480 53.744 46.745 0.00 0.00	H
ATOM 147 2HD2 LEU 10	42.244 53.616 45.004 0.00 0.00	H
ATOM 148 3HD2 LEU 10	42.766 52.192 45.925 0.00 0.00	H
ATOM 149 C LEU 10	44.079 54.716 48.576 0.00 0.00	C
ATOM 150 O LEU 10	43.547 53.962 49.392 0.00 0.00	O
ATOM 151 N MET 11	43.570 55.895 48.214 0.00 0.00	N
ATOM 152 H MET 11	44.105 56.408 47.527 0.00 0.00	H
ATOM 153 CA MET 11	42.362 56.556 48.723 0.00 0.00	C
ATOM 154 HA MET 11	41.907 55.951 49.507 0.00 0.00	H
ATOM 155 CB MET 11	42.757 57.925 49.298 0.00 0.00	C
ATOM 156 HB2 MET 11	43.318 58.500 48.560 0.00 0.00	H
ATOM 157 HB3 MET 11	41.855 58.481 49.554 0.00 0.00	H
ATOM 158 CG MET 11	43.600 57.793 50.569 0.00 0.00	C
ATOM 159 HG2 MET 11	43.048 57.190 51.290 0.00 0.00	H
ATOM 160 HG3 MET 11	44.532 57.283 50.325 0.00 0.00	H
ATOM 161 SD MET 11	44.013 59.388 51.306 0.00 0.00	S
ATOM 162 CE MET 11	44.332 58.842 52.996 0.00 0.00	C
ATOM 163 HE1 MET 11	44.667 59.681 53.606 0.00 0.00	H
ATOM 164 HE2 MET 11	43.415 58.456 53.440 0.00 0.00	H
ATOM 165 HE3 MET 11	45.091 58.059 53.008 0.00 0.00	H
ATOM 166 C MET 11	41.278 56.752 47.653 0.00 0.00	C
ATOM 167 O MET 11	40.207 57.277 47.973 0.00 0.00	O
ATOM 168 N GLY 12	41.533 56.390 46.390 0.00 0.00	N
ATOM 169 H GLY 12	42.432 55.980 46.181 0.00 0.00	H
ATOM 170 CA GLY 12	40.562 56.428 45.297 0.00 0.00	C
ATOM 171 HA2 GLY 12	40.041 55.471 45.257 0.00 0.00	H
ATOM 172 HA3 GLY 12	39.810 57.197 45.476 0.00 0.00	H
ATOM 173 C GLY 12	41.185 56.664 43.919 0.00 0.00	C
ATOM 174 O GLY 12	42.407 56.619 43.756 0.00 0.00	O
ATOM 175 N PHE 13	40.335 56.887 42.919 0.00 0.00	N
ATOM 176 H PHE 13	39.346 56.872 43.143 0.00 0.00	H
ATOM 177 CA PHE 13	40.696 57.272 41.549 0.00 0.00	C
ATOM 178 HA PHE 13	41.664 56.844 41.285 0.00 0.00	H
ATOM 179 CB PHE 13	39.612 56.687 40.627 0.00 0.00	C
ATOM 180 HB2 PHE 13	39.414 55.658 40.921 0.00 0.00	H
ATOM 181 HB3 PHE 13	38.683 57.236 40.782 0.00 0.00	H
ATOM 182 CG PHE 13	39.947 56.684 39.150 0.00 0.00	C
ATOM 183 CD1 PHE 13	39.348 57.619 38.285 0.00 0.00	C
ATOM 184 HD1 PHE 13	38.657 58.357 38.669 0.00 0.00	H
ATOM 185 CE1 PHE 13	39.655 57.603 36.915 0.00 0.00	C
ATOM 186 HE1 PHE 13	39.204 58.335 36.259 0.00 0.00	H
ATOM 187 CZ PHE 13	40.542 56.641 36.401 0.00 0.00	C
ATOM 188 HZ PHE 13	40.776 56.625 35.347 0.00 0.00	H
ATOM 189 CE2 PHE 13	41.140 55.706 37.262 0.00 0.00	C
ATOM 190 HE2 PHE 13	41.825 54.968 36.866 0.00 0.00	H
ATOM 191 CD2 PHE 13	40.847 55.733 38.636 0.00 0.00	C
ATOM 192 HD2 PHE 13	41.307 55.011 39.294 0.00 0.00	H
ATOM 193 C PHE 13	40.779 58.807 41.416 0.00 0.00	C
ATOM 194 O PHE 13	40.400 59.516 42.350 0.00 0.00	O
ATOM 195 N GLU 14	41.212 59.325 40.262 0.00 0.00	N
ATOM 196 H GLU 14	41.615 58.687 39.590 0.00 0.00	H
ATOM 197 CA GLU 14	40.998 60.730 39.887 0.00 0.00	C
ATOM 198 HA GLU 14	40.133 61.110 40.431 0.00 0.00	H
ATOM 199 CB GLU 14	42.218 61.580 40.271 0.00 0.00	C
ATOM 200 HB2 GLU 14	42.473 61.382 41.312 0.00 0.00	H
ATOM 201 HB3 GLU 14	43.067 61.280 39.656 0.00 0.00	H
ATOM 202 CG GLU 14	41.981 63.087 40.093 0.00 0.00	C
ATOM 203 HG2 GLU 14	42.945 63.593 40.152 0.00 0.00	H
ATOM 204 HG3 GLU 14	41.572 63.313 39.108 0.00 0.00	H
ATOM 205 CD GLU 14	41.070 63.643 41.183 0.00 0.00	C
ATOM 206 OE1 GLU 14	41.563 64.016 42.267 0.00 0.00	O
ATOM 207 OE2 GLU 14	39.833 63.694 40.994 0.00 0.00	O
ATOM 208 C GLU 14	40.681 60.902 38.396 0.00 0.00	C
ATOM 209 O GLU 14	39.641 61.488 38.083 0.00 0.00	O
ATOM 210 N PHE 15	41.543 60.445 37.475 0.00 0.00	N
ATOM 211 H PHE 15	42.364 59.937 37.773 0.00 0.00	H
ATOM 212 CA PHE 15	41.391 60.707 36.040 0.00 0.00	C
ATOM 213 HA PHE 15	40.323 60.784 35.835 0.00 0.00	H
ATOM 214 CB PHE 15	42.028 62.063 35.670 0.00 0.00	C
ATOM 215 HB2 PHE 15	41.667 62.358 34.684 0.00 0.00	H
ATOM 216 HB3 PHE 15	41.657 62.812 36.370 0.00 0.00	H
ATOM 217 CG PHE 15	43.547 62.152 35.647 0.00 0.00	C
ATOM 218 CD1 PHE 15	44.275 61.704 34.526 0.00 0.00	C
ATOM 219 HD1 PHE 15	43.757 61.281 33.678 0.00 0.00	H
ATOM 220 CE1 PHE 15	45.675 61.829 34.487 0.00 0.00	C
ATOM 221 HE1 PHE 15	46.238 61.465 33.640 0.00 0.00	H
ATOM 222 CZ PHE 15	46.358 62.427 35.562 0.00 0.00	C
ATOM 223 HZ PHE 15	47.435 62.502 35.542 0.00 0.00	H
ATOM 224 CE2 PHE 15	45.635 62.906 36.662 0.00 0.00	C
ATOM 225 HE2 PHE 15	46.169 63.361 37.483 0.00 0.00	H
ATOM 226 CD2 PHE 15	44.236 62.756 36.715 0.00 0.00	C
ATOM 227 HD2 PHE 15	43.692 63.110 37.578 0.00 0.00	H
ATOM 228 C PHE 15	41.907 59.586 35.139 0.00 0.00	C
ATOM 229 O PHE 15	42.725 58.758 35.537 0.00 0.00	O
ATOM 230 N ILE 16	41.450 59.591 33.889 0.00 0.00	N
ATOM 231 H ILE 16	40.813 60.344 33.643 0.00 0.00	H
ATOM 232 CA ILE 16	41.948 58.758 32.783 0.00 0.00	C
ATOM 233 HA ILE 16	42.739 58.102 33.150 0.00 0.00	H
ATOM 234 CB ILE 16	40.801 57.872 32.243 0.00 0.00	C
ATOM 235 HB ILE 16	40.399 57.316 33.091 0.00 0.00	H
ATOM 236 CG2 ILE 16	39.650 58.712 31.652 0.00 0.00	C
ATOM 237 1HG2 ILE 16	38.846 58.066 31.303 0.00 0.00	H
ATOM 238 2HG2 ILE 16	39.238 59.376 32.410 0.00 0.00	H
ATOM 239 3HG2 ILE 16	40.011 59.308 30.815 0.00 0.00	H
ATOM 240 CG1 ILE 16	41.342 56.839 31.232 0.00 0.00	C
ATOM 241 2HG1 ILE 16	41.602 57.330 30.294 0.00 0.00	H
ATOM 242 3HG1 ILE 16	42.245 56.386 31.644 0.00 0.00	H
ATOM 243 CD1 ILE 16	40.347 55.709 30.950 0.00 0.00	C
ATOM 244 1HD1 ILE 16	40.832 54.943 30.348 0.00 0.00	H
ATOM 245 2HD1 ILE 16	40.021 55.264 31.889 0.00 0.00	H
ATOM 246 3HD1 ILE 16	39.483 56.086 30.404 0.00 0.00	H
ATOM 247 C ILE 16	42.575 59.665 31.719 0.00 0.00	C
ATOM 248 O ILE 16	42.107 60.790 31.545 0.00 0.00	O
ATOM 249 N GLU 17	43.626 59.207 31.043 0.00 0.00	N
ATOM 250 H GLU 17	43.954 58.268 31.216 0.00 0.00	H
ATOM 251 CA GLU 17	44.368 59.967 30.038 0.00 0.00	C
ATOM 252 HA GLU 17	43.826 60.883 29.804 0.00 0.00	H
ATOM 253 CB GLU 17	45.743 60.357 30.619 0.00 0.00	C
ATOM 254 HB2 GLU 17	45.586 60.951 31.520 0.00 0.00	H
ATOM 255 HB3 GLU 17	46.271 59.446 30.899 0.00 0.00	H
ATOM 256 CG GLU 17	46.617 61.171 29.653 0.00 0.00	C
ATOM 257 HG2 GLU 17	46.807 60.592 28.749 0.00 0.00	H
ATOM 258 HG3 GLU 17	46.085 62.079 29.368 0.00 0.00	H
ATOM 259 CD GLU 17	47.968 61.554 30.260 0.00 0.00	C
ATOM 260 OE1 GLU 17	48.491 60.832 31.136 0.00 0.00	O
ATOM 261 OE2 GLU 17	48.556 62.577 29.835 0.00 0.00	O
ATOM 262 C GLU 17	44.504 59.169 28.741 0.00 0.00	C
ATOM 263 O GLU 17	44.986 58.040 28.749 0.00 0.00	O
ATOM 264 N PHE 18	44.114 59.774 27.619 0.00 0.00	N
ATOM 265 H PHE 18	43.747 60.717 27.703 0.00 0.00	H
ATOM 266 CA PHE 18	44.169 59.201 26.273 0.00 0.00	C
ATOM 267 HA PHE 18	44.518 58.171 26.321 0.00 0.00	H
ATOM 268 CB PHE 18	42.772 59.234 25.643 0.00 0.00	C
ATOM 269 HB2 PHE 18	42.432 60.271 25.617 0.00 0.00	H
ATOM 270 HB3 PHE 18	42.863 58.904 24.606 0.00 0.00	H
ATOM 271 CG PHE 18	41.697 58.400 26.305 0.00 0.00	C
ATOM 272 CD1 PHE 18	41.315 57.174 25.731 0.00 0.00	C
ATOM 273 HD1 PHE 18	41.865 56.789 24.886 0.00 0.00	H
ATOM 274 CE1 PHE 18	40.209 56.470 26.238 0.00 0.00	C
ATOM 275 HE1 PHE 18	39.914 55.530 25.793 0.00 0.00	H
ATOM 276 CZ PHE 18	39.501 56.983 27.338 0.00 0.00	C
ATOM 277 HZ PHE 18	38.651 56.456 27.741 0.00 0.00	H
ATOM 278 CE2 PHE 18	39.899 58.190 27.930 0.00 0.00	C
ATOM 279 HE2 PHE 18	39.350 58.570 28.773 0.00 0.00	H
ATOM 280 CD2 PHE 18	40.993 58.904 27.414 0.00 0.00	C
ATOM 281 HD2 PHE 18	41.278 59.850 27.853 0.00 0.00	H
ATOM 282 C PHE 18	45.108 60.007 25.372 0.00 0.00	C
ATOM 283 O PHE 18	45.139 61.234 25.475 0.00 0.00	O
ATOM 284 N ALA 19	45.792 59.343 24.435 0.00 0.00	N
ATOM 285 H ALA 19	45.647 58.347 24.346 0.00 0.00	H
ATOM 286 CA ALA 19	46.574 60.001 23.380 0.00 0.00	C
ATOM 287 HA ALA 19	46.142 60.983 23.189 0.00 0.00	H
ATOM 288 CB ALA 19	48.013 60.212 23.858 0.00 0.00	C
ATOM 289 HB1 ALA 19	48.486 59.264 24.113 0.00 0.00	H
ATOM 290 HB2 ALA 19	48.597 60.670 23.060 0.00 0.00	H
ATOM 291 HB3 ALA 19	48.033 60.867 24.729 0.00 0.00	H
ATOM 292 C ALA 19	46.514 59.215 22.052 0.00 0.00	C
ATOM 293 O ALA 19	46.072 58.063 22.017 0.00 0.00	O
ATOM 294 N SER 20	46.911 59.861 20.954 0.00 0.00	N
ATOM 295 H SER 20	47.244 60.808 21.068 0.00 0.00	H
ATOM 296 CA SER 20	46.920 59.313 19.591 0.00 0.00	C
ATOM 297 HA SER 20	46.954 58.225 19.640 0.00 0.00	H
ATOM 298 CB SER 20	45.634 59.717 18.867 0.00 0.00	C
ATOM 299 HB2 SER 20	44.775 59.349 19.427 0.00 0.00	H
ATOM 300 HB3 SER 20	45.604 60.806 18.821 0.00 0.00	H
ATOM 301 OG SER 20	45.610 59.184 17.551 0.00 0.00	O
ATOM 302 HG SER 20	44.971 59.666 17.021 0.00 0.00	H
ATOM 303 C SER 20	48.134 59.836 18.788 0.00 0.00	C
ATOM 304 O SER 20	48.528 60.991 19.000 0.00 0.00	O
ATOM 305 N PRO 21	48.716 59.040 17.868 0.00 0.00	N
ATOM 306 CD PRO 21	48.441 57.629 17.643 0.00 0.00	C
ATOM 307 HD2 PRO 21	47.394 57.447 17.399 0.00 0.00	H
ATOM 308 HD3 PRO 21	48.707 57.072 18.541 0.00 0.00	H
ATOM 309 CG PRO 21	49.334 57.203 16.487 0.00 0.00	C
ATOM 310 HG2 PRO 21	48.793 57.300 15.545 0.00 0.00	H
ATOM 311 HG3 PRO 21	49.709 56.189 16.626 0.00 0.00	H
ATOM 312 CB PRO 21	50.474 58.204 16.516 0.00 0.00	C
ATOM 313 HB2 PRO 21	50.943 58.307 15.538 0.00 0.00	H
ATOM 314 HB3 PRO 21	51.202 57.914 17.274 0.00 0.00	H
ATOM 315 CA PRO 21	49.782 59.490 16.977 0.00 0.00	C
ATOM 316 HA PRO 21	50.490 60.107 17.530 0.00 0.00	H
ATOM 317 C PRO 21	49.249 60.311 15.791 0.00 0.00	C
ATOM 318 O PRO 21	50.062 60.858 15.044 0.00 0.00	O
ATOM 319 N THR 22	47.922 60.409 15.610 0.00 0.00	N
ATOM 320 H THR 22	47.306 59.918 16.242 0.00 0.00	H
ATOM 321 CA THR 22	47.261 61.246 14.602 0.00 0.00	C
ATOM 322 HA THR 22	48.019 61.764 14.014 0.00 0.00	H
ATOM 323 CB THR 22	46.447 60.384 13.633 0.00 0.00	C
ATOM 324 HB THR 22	45.834 61.037 13.011 0.00 0.00	H
ATOM 325 CG2 THR 22	47.359 59.553 12.729 0.00 0.00	C
ATOM 326 1HG2 THR 22	48.051 60.192 12.180 0.00 0.00	H
ATOM 327 2HG2 THR 22	47.943 58.836 13.307 0.00 0.00	H
ATOM 328 3HG2 THR 22	46.750 59.002 12.012 0.00 0.00	H
ATOM 329 OG1 THR 22	45.607 59.484 14.315 0.00 0.00	O
ATOM 330 HG1 THR 22	44.910 59.229 13.705 0.00 0.00	H
ATOM 331 C THR 22	46.379 62.321 15.286 0.00 0.00	C
ATOM 332 O THR 22	45.970 62.125 16.439 0.00 0.00	O
ATOM 333 N PRO 23	46.116 63.476 14.635 0.00 0.00	N
ATOM 334 CD PRO 23	46.636 63.884 13.332 0.00 0.00	C
ATOM 335 HD2 PRO 23	46.252 63.236 12.543 0.00 0.00	H
ATOM 336 HD3 PRO 23	47.725 63.851 13.345 0.00 0.00	H
ATOM 337 CG PRO 23	46.179 65.328 13.098 0.00 0.00	C
ATOM 338 HG2 PRO 23	45.260 65.339 12.511 0.00 0.00	H
ATOM 339 HG3 PRO 23	46.945 65.929 12.608 0.00 0.00	H
ATOM 340 CB PRO 23	45.903 65.849 14.507 0.00 0.00	C
ATOM 341 HB2 PRO 23	45.177 66.661 14.505 0.00 0.00	H
ATOM 342 HB3 PRO 23	46.838 66.190 14.952 0.00 0.00	H
ATOM 343 CA PRO 23	45.405 64.599 15.243 0.00 0.00	C
ATOM 344 HA PRO 23	45.689 64.699 16.291 0.00 0.00	H
ATOM 345 C PRO 23	43.884 64.435 15.132 0.00 0.00	C
ATOM 346 O PRO 23	43.377 64.082 14.067 0.00 0.00	O
ATOM 347 N GLY 24	43.162 64.722 16.217 0.00 0.00	N
ATOM 348 H GLY 24	43.656 64.988 17.056 0.00 0.00	H
ATOM 349 CA GLY 24	41.694 64.771 16.235 0.00 0.00	C
ATOM 350 HA2 GLY 24	41.385 65.376 17.087 0.00 0.00	H
ATOM 351 HA3 GLY 24	41.341 65.251 15.322 0.00 0.00	H
ATOM 352 C GLY 24	40.977 63.419 16.342 0.00 0.00	C
ATOM 353 O GLY 24	39.779 63.373 16.078 0.00 0.00	O
ATOM 354 N THR 25	41.672 62.333 16.699 0.00 0.00	N
ATOM 355 H THR 25	42.648 62.464 16.926 0.00 0.00	H
ATOM 356 CA THR 25	41.146 60.940 16.735 0.00 0.00	C
ATOM 357 HA THR 25	40.543 60.787 15.840 0.00 0.00	H
ATOM 358 CB THR 25	42.293 59.907 16.743 0.00 0.00	C
ATOM 359 HB THR 25	42.477 59.589 17.769 0.00 0.00	H
ATOM 360 CG2 THR 25	41.987 58.690 15.876 0.00 0.00	C
ATOM 361 1HG2 THR 25	41.763 59.009 14.858 0.00 0.00	H
ATOM 362 2HG2 THR 25	42.855 58.030 15.863 0.00 0.00	H
ATOM 363 3HG2 THR 25	41.136 58.144 16.285 0.00 0.00	H
ATOM 364 OG1 THR 25	43.480 60.458 16.256 0.00 0.00	O
ATOM 365 HG1 THR 25	43.335 60.696 15.337 0.00 0.00	H
ATOM 366 C THR 25	40.239 60.665 17.936 0.00 0.00	C
ATOM 367 O THR 25	39.477 59.698 17.908 0.00 0.00	O
ATOM 368 N LEU 26	40.355 61.473 18.990 0.00 0.00	N
ATOM 369 H LEU 26	40.977 62.262 18.892 0.00 0.00	H
ATOM 370 CA LEU 26	39.816 61.219 20.329 0.00 0.00	C
ATOM 371 HA LEU 26	39.447 60.196 20.408 0.00 0.00	H
ATOM 372 CB LEU 26	40.952 61.415 21.357 0.00 0.00	C
ATOM 373 HB2 LEU 26	41.171 62.480 21.433 0.00 0.00	H
ATOM 374 HB3 LEU 26	40.584 61.070 22.323 0.00 0.00	H
ATOM 375 CG LEU 26	42.276 60.675 21.074 0.00 0.00	C
ATOM 376 HG LEU 26	42.638 60.944 20.082 0.00 0.00	H
ATOM 377 CD1 LEU 26	43.337 61.138 22.081 0.00 0.00	C
ATOM 378 1HD1 LEU 26	43.042 60.886 23.100 0.00 0.00	H
ATOM 379 2HD1 LEU 26	44.275 60.632 21.855 0.00 0.00	H
ATOM 380 3HD1 LEU 26	43.493 62.213 22.001 0.00 0.00	H
ATOM 381 CD2 LEU 26	42.094 59.155 21.139 0.00 0.00	C
ATOM 382 1HD2 LEU 26	41.670 58.866 22.100 0.00 0.00	H
ATOM 383 2HD2 LEU 26	41.424 58.828 20.343 0.00 0.00	H
ATOM 384 3HD2 LEU 26	43.059 58.665 21.011 0.00 0.00	H
ATOM 385 C LEU 26	38.642 62.163 20.635 0.00 0.00	C
ATOM 386 O LEU 26	37.582 61.700 21.054 0.00 0.00	O
ATOM 387 N GLU 27	38.826 63.459 20.375 0.00 0.00	N
ATOM 388 H GLU 27	39.739 63.734 20.040 0.00 0.00	H
ATOM 389 CA GLU 27	37.822 64.507 20.592 0.00 0.00	C
ATOM 390 HA GLU 27	37.754 64.679 21.667 0.00 0.00	H
ATOM 391 CB GLU 27	38.323 65.818 19.962 0.00 0.00	C
ATOM 392 HB2 GLU 27	39.165 66.177 20.553 0.00 0.00	H
ATOM 393 HB3 GLU 27	38.689 65.625 18.954 0.00 0.00	H
ATOM 394 CG GLU 27	37.266 66.928 19.889 0.00 0.00	C
ATOM 395 HG2 GLU 27	36.435 66.612 19.258 0.00 0.00	H
ATOM 396 HG3 GLU 27	36.867 67.142 20.880 0.00 0.00	H
ATOM 397 CD GLU 27	37.889 68.182 19.300 0.00 0.00	C
ATOM 398 OE1 GLU 27	38.533 68.972 20.031 0.00 0.00	O
ATOM 399 OE2 GLU 27	37.742 68.374 18.067 0.00 0.00	O
ATOM 400 C GLU 27	36.402 64.132 20.115 0.00 0.00	C
ATOM 401 O GLU 27	35.503 64.138 20.960 0.00 0.00	O
ATOM 402 N PRO 28	36.160 63.791 18.832 0.00 0.00	N
ATOM 403 CD PRO 28	37.108 63.700 17.722 0.00 0.00	C
ATOM 404 HD2 PRO 28	38.003 63.140 17.991 0.00 0.00	H
ATOM 405 HD3 PRO 28	37.377 64.696 17.370 0.00 0.00	H
ATOM 406 CG PRO 28	36.363 62.970 16.609 0.00 0.00	C
ATOM 407 HG2 PRO 28	36.435 61.893 16.762 0.00 0.00	H
ATOM 408 HG3 PRO 28	36.734 63.251 15.623 0.00 0.00	H
ATOM 409 CB PRO 28	34.923 63.417 16.819 0.00 0.00	C
ATOM 410 HB2 PRO 28	34.211 62.692 16.425 0.00 0.00	H
ATOM 411 HB3 PRO 28	34.766 64.389 16.350 0.00 0.00	H
ATOM 412 CA PRO 28	34.810 63.572 18.336 0.00 0.00	C
ATOM 413 HA PRO 28	34.208 64.454 18.552 0.00 0.00	H
ATOM 414 C PRO 28	34.125 62.366 18.972 0.00 0.00	C
ATOM 415 O PRO 28	32.907 62.406 19.129 0.00 0.00	O
ATOM 416 N ILE 29	34.871 61.312 19.337 0.00 0.00	N
ATOM 417 H ILE 29	35.877 61.392 19.261 0.00 0.00	H
ATOM 418 CA ILE 29	34.295 60.136 20.001 0.00 0.00	C
ATOM 419 HA ILE 29	33.364 59.915 19.488 0.00 0.00	H
ATOM 420 CB ILE 29	35.159 58.863 19.847 0.00 0.00	C
ATOM 421 HB ILE 29	34.546 58.043 20.222 0.00 0.00	H
ATOM 422 CG2 ILE 29	35.434 58.594 18.354 0.00 0.00	C
ATOM 423 1HG2 ILE 29	34.491 58.496 17.814 0.00 0.00	H
ATOM 424 2HG2 ILE 29	36.014 59.407 17.915 0.00 0.00	H
ATOM 425 3HG2 ILE 29	36.007 57.677 18.232 0.00 0.00	H
ATOM 426 CG1 ILE 29	36.481 58.852 20.639 0.00 0.00	C
ATOM 427 2HG1 ILE 29	37.264 59.345 20.065 0.00 0.00	H
ATOM 428 3HG1 ILE 29	36.360 59.371 21.585 0.00 0.00	H
ATOM 429 CD1 ILE 29	36.927 57.431 20.984 0.00 0.00	C
ATOM 430 1HD1 ILE 29	37.790 57.486 21.646 0.00 0.00	H
ATOM 431 2HD1 ILE 29	36.123 56.912 21.505 0.00 0.00	H
ATOM 432 3HD1 ILE 29	37.195 56.883 20.082 0.00 0.00	H
ATOM 433 C ILE 29	33.889 60.445 21.449 0.00 0.00	C
ATOM 434 O ILE 29	32.826 60.011 21.894 0.00 0.00	O
ATOM 435 N PHE 30	34.691 61.230 22.174 0.00 0.00	N
ATOM 436 H PHE 30	35.544 61.567 21.739 0.00 0.00	H
ATOM 437 CA PHE 30	34.337 61.764 23.489 0.00 0.00	C
ATOM 438 HA PHE 30	34.081 60.936 24.147 0.00 0.00	H
ATOM 439 CB PHE 30	35.532 62.522 24.094 0.00 0.00	C
ATOM 440 HB2 PHE 30	35.736 63.395 23.471 0.00 0.00	H
ATOM 441 HB3 PHE 30	35.245 62.893 25.076 0.00 0.00	H
ATOM 442 CG PHE 30	36.831 61.749 24.265 0.00 0.00	C
ATOM 443 CD1 PHE 30	36.860 60.339 24.325 0.00 0.00	C
ATOM 444 HD1 PHE 30	35.956 59.758 24.255 0.00 0.00	H
ATOM 445 CE1 PHE 30	38.080 59.656 24.456 0.00 0.00	C
ATOM 446 HE1 PHE 30	38.100 58.576 24.484 0.00 0.00	H
ATOM 447 CZ PHE 30	39.277 60.381 24.547 0.00 0.00	C
ATOM 448 HZ PHE 30	40.213 59.854 24.635 0.00 0.00	H
ATOM 449 CE2 PHE 30	39.256 61.785 24.525 0.00 0.00	C
ATOM 450 HE2 PHE 30	40.179 62.334 24.621 0.00 0.00	H
ATOM 451 CD2 PHE 30	38.036 62.468 24.380 0.00 0.00	C
ATOM 452 HD2 PHE 30	38.022 63.548 24.355 0.00 0.00	H
ATOM 453 C PHE 30	33.088 62.647 23.391 0.00 0.00	C
ATOM 454 O PHE 30	32.172 62.493 24.202 0.00 0.00	O
ATOM 455 N GLU 31	33.041 63.529 22.389 0.00 0.00	N
ATOM 456 H GLU 31	33.851 63.602 21.789 0.00 0.00	H
ATOM 457 CA GLU 31	31.938 64.451 22.185 0.00 0.00	C
ATOM 458 HA GLU 31	31.690 64.898 23.148 0.00 0.00	H
ATOM 459 CB GLU 31	32.370 65.583 21.253 0.00 0.00	C
ATOM 460 HB2 GLU 31	32.768 65.193 20.317 0.00 0.00	H
ATOM 461 HB3 GLU 31	31.486 66.174 21.011 0.00 0.00	H
ATOM 462 CG GLU 31	33.382 66.529 21.914 0.00 0.00	C
ATOM 463 HG2 GLU 31	33.244 66.517 22.995 0.00 0.00	H
ATOM 464 HG3 GLU 31	34.402 66.219 21.690 0.00 0.00	H
ATOM 465 CD GLU 31	33.182 67.952 21.418 0.00 0.00	C
ATOM 466 OE1 GLU 31	33.196 68.169 20.181 0.00 0.00	O
ATOM 467 OE2 GLU 31	32.897 68.840 22.260 0.00 0.00	O
ATOM 468 C GLU 31	30.627 63.803 21.699 0.00 0.00	C
ATOM 469 O GLU 31	29.589 64.460 21.803 0.00 0.00	O
ATOM 470 N ILE 32	30.611 62.550 21.222 0.00 0.00	N
ATOM 471 H ILE 32	31.491 62.081 21.065 0.00 0.00	H
ATOM 472 CA ILE 32	29.351 61.778 21.118 0.00 0.00	C
ATOM 473 HA ILE 32	28.530 62.480 20.970 0.00 0.00	H
ATOM 474 CB ILE 32	29.302 60.819 19.904 0.00 0.00	C
ATOM 475 HB ILE 32	28.362 60.271 19.962 0.00 0.00	H
ATOM 476 CG2 ILE 32	29.274 61.632 18.599 0.00 0.00	C
ATOM 477 1HG2 ILE 32	28.990 60.987 17.768 0.00 0.00	H
ATOM 478 2HG2 ILE 32	28.537 62.430 18.687 0.00 0.00	H
ATOM 479 3HG2 ILE 32	30.253 62.067 18.396 0.00 0.00	H
ATOM 480 CG1 ILE 32	30.420 59.769 19.905 0.00 0.00	C
ATOM 481 2HG1 ILE 32	31.366 60.301 19.803 0.00 0.00	H
ATOM 482 3HG1 ILE 32	30.417 59.226 20.851 0.00 0.00	H
ATOM 483 CD1 ILE 32	30.331 58.729 18.777 0.00 0.00	C
ATOM 484 1HD1 ILE 32	31.120 57.987 18.906 0.00 0.00	H
ATOM 485 2HD1 ILE 32	29.366 58.224 18.804 0.00 0.00	H
ATOM 486 3HD1 ILE 32	30.476 59.200 17.805 0.00 0.00	H
ATOM 487 C ILE 32	29.018 61.055 22.420 0.00 0.00	C
ATOM 488 O ILE 32	27.842 61.000 22.759 0.00 0.00	O
ATOM 489 N MET 33	29.995 60.565 23.189 0.00 0.00	N
ATOM 490 H MET 33	30.949 60.673 22.857 0.00 0.00	H
ATOM 491 CA MET 33	29.772 59.941 24.507 0.00 0.00	C
ATOM 492 HA MET 33	28.947 59.238 24.412 0.00 0.00	H
ATOM 493 CB MET 33	31.022 59.145 24.917 0.00 0.00	C
ATOM 494 HB2 MET 33	31.910 59.769 24.825 0.00 0.00	H
ATOM 495 HB3 MET 33	30.922 58.816 25.951 0.00 0.00	H
ATOM 496 CG MET 33	31.174 57.896 24.049 0.00 0.00	C
ATOM 497 HG2 MET 33	30.229 57.354 24.085 0.00 0.00	H
ATOM 498 HG3 MET 33	31.359 58.198 23.017 0.00 0.00	H
ATOM 499 SD MET 33	32.480 56.753 24.564 0.00 0.00	S
ATOM 500 CE MET 33	33.928 57.677 24.002 0.00 0.00	C
ATOM 501 HE1 MET 33	34.831 57.103 24.208 0.00 0.00	H
ATOM 502 HE2 MET 33	33.855 57.854 22.930 0.00 0.00	H
ATOM 503 HE3 MET 33	33.977 58.630 24.524 0.00 0.00	H
ATOM 504 C MET 33	29.334 60.909 25.628 0.00 0.00	C
ATOM 505 O MET 33	29.189 60.481 26.774 0.00 0.00	O
ATOM 506 N GLY 34	29.091 62.192 25.330 0.00 0.00	N
ATOM 507 H GLY 34	29.208 62.464 24.364 0.00 0.00	H
ATOM 508 CA GLY 34	28.534 63.182 26.257 0.00 0.00	C
ATOM 509 HA2 GLY 34	27.874 63.853 25.706 0.00 0.00	H
ATOM 510 HA3 GLY 34	27.965 62.655 27.023 0.00 0.00	H
ATOM 511 C GLY 34	29.566 64.050 26.974 0.00 0.00	C
ATOM 512 O GLY 34	29.189 64.916 27.764 0.00 0.00	O
ATOM 513 N PHE 35	30.861 63.824 26.744 0.00 0.00	N
ATOM 514 H PHE 35	31.103 63.174 26.007 0.00 0.00	H
ATOM 515 CA PHE 35	31.945 64.569 27.383 0.00 0.00	C
ATOM 516 HA PHE 35	31.676 64.772 28.418 0.00 0.00	H
ATOM 517 CB PHE 35	33.217 63.714 27.357 0.00 0.00	C
ATOM 518 HB2 PHE 35	33.468 63.495 26.320 0.00 0.00	H
ATOM 519 HB3 PHE 35	34.034 64.296 27.771 0.00 0.00	H
ATOM 520 CG PHE 35	33.117 62.420 28.135 0.00 0.00	C
ATOM 521 CD1 PHE 35	32.791 61.220 27.478 0.00 0.00	C
ATOM 522 HD1 PHE 35	32.625 61.219 26.413 0.00 0.00	H
ATOM 523 CE1 PHE 35	32.675 60.024 28.206 0.00 0.00	C
ATOM 524 HE1 PHE 35	32.426 59.099 27.705 0.00 0.00	H
ATOM 525 CZ PHE 35	32.881 60.027 29.595 0.00 0.00	C
ATOM 526 HZ PHE 35	32.781 59.106 30.150 0.00 0.00	H
ATOM 527 CE2 PHE 35	33.223 61.223 30.249 0.00 0.00	C
ATOM 528 HE2 PHE 35	33.393 61.224 31.312 0.00 0.00	H
ATOM 529 CD2 PHE 35	33.344 62.418 29.522 0.00 0.00	C
ATOM 530 HD2 PHE 35	33.609 63.333 30.032 0.00 0.00	H
ATOM 531 C PHE 35	32.194 65.909 26.680 0.00 0.00	C
ATOM 532 O PHE 35	32.272 65.949 25.456 0.00 0.00	O
ATOM 533 N THR 36	32.413 66.972 27.464 0.00 0.00	N
ATOM 534 H THR 36	32.421 66.818 28.463 0.00 0.00	H
ATOM 535 CA THR 36	32.670 68.337 26.989 0.00 0.00	C
ATOM 536 HA THR 36	32.745 68.341 25.901 0.00 0.00	H
ATOM 537 CB THR 36	31.520 69.266 27.394 0.00 0.00	C
ATOM 538 HB THR 36	31.483 69.369 28.479 0.00 0.00	H
ATOM 539 CG2 THR 36	31.649 70.644 26.752 0.00 0.00	C
ATOM 540 1HG2 THR 36	31.780 70.556 25.674 0.00 0.00	H
ATOM 541 2HG2 THR 36	30.759 71.239 26.958 0.00 0.00	H
ATOM 542 3HG2 THR 36	32.510 71.162 27.175 0.00 0.00	H
ATOM 543 OG1 THR 36	30.321 68.686 26.933 0.00 0.00	O
ATOM 544 HG1 THR 36	29.604 69.300 27.107 0.00 0.00	H
ATOM 545 C THR 36	33.998 68.813 27.555 0.00 0.00	C
ATOM 546 O THR 36	34.278 68.584 28.726 0.00 0.00	O
ATOM 547 N LYS 37	34.827 69.446 26.723 0.00 0.00	N
ATOM 548 H LYS 37	34.525 69.619 25.775 0.00 0.00	H
ATOM 549 CA LYS 37	36.096 70.040 27.144 0.00 0.00	C
ATOM 550 HA LYS 37	36.629 69.330 27.776 0.00 0.00	H
ATOM 551 CB LYS 37	36.965 70.332 25.917 0.00 0.00	C
ATOM 552 HB2 LYS 37	37.060 69.422 25.325 0.00 0.00	H
ATOM 553 HB3 LYS 37	36.470 71.096 25.317 0.00 0.00	H
ATOM 554 CG LYS 37	38.369 70.824 26.307 0.00 0.00	C
ATOM 555 HG2 LYS 37	38.296 71.797 26.792 0.00 0.00	H
ATOM 556 HG3 LYS 37	38.803 70.124 27.022 0.00 0.00	H
ATOM 557 CD LYS 37	39.320 70.937 25.118 0.00 0.00	C
ATOM 558 HD2 LYS 37	40.243 71.413 25.450 0.00 0.00	H
ATOM 559 HD3 LYS 37	39.554 69.931 24.768 0.00 0.00	H
ATOM 560 CE LYS 37	38.750 71.735 23.948 0.00 0.00	C
ATOM 561 HE2 LYS 37	37.821 71.271 23.616 0.00 0.00	H
ATOM 562 HE3 LYS 37	38.550 72.755 24.273 0.00 0.00	H
ATOM 563 NZ LYS 37	39.700 71.749 22.818 0.00 0.00	N
ATOM 564 HZ1 LYS 37	40.518 72.292 23.053 0.00 0.00	H
ATOM 565 HZ2 LYS 37	39.966 70.808 22.565 0.00 0.00	H
ATOM 566 HZ3 LYS 37	39.267 72.166 22.006 0.00 0.00	H
ATOM 567 C LYS 37	35.826 71.329 27.941 0.00 0.00	C
ATOM 568 O LYS 37	35.158 72.220 27.418 0.00 0.00	O
ATOM 569 N VAL 38	36.349 71.421 29.165 0.00 0.00	N
ATOM 570 H VAL 38	36.884 70.627 29.486 0.00 0.00	H
ATOM 571 CA VAL 38	36.094 72.564 30.066 0.00 0.00	C
ATOM 572 HA VAL 38	35.457 73.279 29.545 0.00 0.00	H
ATOM 573 CB VAL 38	35.338 72.135 31.347 0.00 0.00	C
ATOM 574 HB VAL 38	35.075 73.029 31.913 0.00 0.00	H
ATOM 575 CG1 VAL 38	34.033 71.410 30.992 0.00 0.00	C
ATOM 576 1HG1 VAL 38	34.238 70.464 30.491 0.00 0.00	H
ATOM 577 2HG1 VAL 38	33.467 71.210 31.902 0.00 0.00	H
ATOM 578 3HG1 VAL 38	33.418 72.030 30.340 0.00 0.00	H
ATOM 579 CG2 VAL 38	36.185 71.227 32.252 0.00 0.00	C
ATOM 580 1HG2 VAL 38	35.627 71.017 33.165 0.00 0.00	H
ATOM 581 2HG2 VAL 38	36.422 70.291 31.746 0.00 0.00	H
ATOM 582 3HG2 VAL 38	37.121 71.709 32.534 0.00 0.00	H
ATOM 583 C VAL 38	37.359 73.331 30.456 0.00 0.00	C
ATOM 584 O VAL 38	37.252 74.474 30.890 0.00 0.00	O
ATOM 585 N ALA 39	38.554 72.747 30.317 0.00 0.00	N
ATOM 586 H ALA 39	38.609 71.818 29.924 0.00 0.00	H
ATOM 587 CA ALA 39	39.813 73.353 30.752 0.00 0.00	C
ATOM 588 HA ALA 39	39.787 74.416 30.513 0.00 0.00	H
ATOM 589 CB ALA 39	39.967 73.179 32.275 0.00 0.00	C
ATOM 590 HB1 ALA 39	39.077 73.526 32.801 0.00 0.00	H
ATOM 591 HB2 ALA 39	40.126 72.128 32.515 0.00 0.00	H
ATOM 592 HB3 ALA 39	40.820 73.748 32.645 0.00 0.00	H
ATOM 593 C ALA 39	41.012 72.783 29.993 0.00 0.00	C
ATOM 594 O ALA 39	40.898 71.781 29.291 0.00 0.00	O
ATOM 595 N THR 40	42.165 73.422 30.177 0.00 0.00	N
ATOM 596 H THR 40	42.143 74.271 30.723 0.00 0.00	H
ATOM 597 CA THR 40	43.452 73.093 29.552 0.00 0.00	C
ATOM 598 HA THR 40	43.458 72.055 29.220 0.00 0.00	H
ATOM 599 CB THR 40	43.709 74.005 28.352 0.00 0.00	C
ATOM 600 HB THR 40	44.742 73.887 28.025 0.00 0.00	H
ATOM 601 CG2 THR 40	42.789 73.654 27.190 0.00 0.00	C
ATOM 602 1HG2 THR 40	42.873 72.591 26.962 0.00 0.00	H
ATOM 603 2HG2 THR 40	41.754 73.888 27.439 0.00 0.00	H
ATOM 604 3HG2 THR 40	43.083 74.231 26.313 0.00 0.00	H
ATOM 605 OG1 THR 40	43.470 75.338 28.734 0.00 0.00	O
ATOM 606 HG1 THR 40	44.321 75.709 28.979 0.00 0.00	H
ATOM 607 C THR 40	44.561 73.266 30.577 0.00 0.00	C
ATOM 608 O THR 40	44.439 74.054 31.511 0.00 0.00	O
ATOM 609 N HIE 41	45.642 72.515 30.418 0.00 0.00	N
ATOM 610 H HIE 41	45.689 71.892 29.624 0.00 0.00	H
ATOM 611 CA HIE 41	46.771 72.540 31.349 0.00 0.00	C
ATOM 612 HA HIE 41	46.376 72.416 32.357 0.00 0.00	H
ATOM 613 CB HIE 41	47.646 71.312 31.055 0.00 0.00	C
ATOM 614 HB2 HIE 41	46.997 70.449 30.902 0.00 0.00	H
ATOM 615 HB3 HIE 41	48.199 71.474 30.130 0.00 0.00	H
ATOM 616 CG HIE 41	48.604 70.970 32.151 0.00 0.00	C
ATOM 617 ND1 HIE 41	49.714 71.724 32.531 0.00 0.00	N
ATOM 618 CE1 HIE 41	50.229 71.099 33.606 0.00 0.00	C
ATOM 619 HE1 HIE 41	51.092 71.438 34.161 0.00 0.00	H
ATOM 620 NE2 HIE 41	49.517 69.994 33.887 0.00 0.00	N
ATOM 621 HE2 HIE 41	49.660 69.381 34.677 0.00 0.00	H
ATOM 622 CD2 HIE 41	48.502 69.892 32.972 0.00 0.00	C
ATOM 623 HD2 HIE 41	47.736 69.130 32.951 0.00 0.00	H
ATOM 624 C HIE 41	47.538 73.881 31.296 0.00 0.00	C
ATOM 625 O HIE 41	47.671 74.478 30.226 0.00 0.00	O
ATOM 626 N ARG 42	48.055 74.366 32.432 0.00 0.00	N
ATOM 627 H ARG 42	47.933 73.827 33.277 0.00 0.00	H
ATOM 628 CA ARG 42	48.844 75.603 32.507 0.00 0.00	C
ATOM 629 HA ARG 42	48.266 76.428 32.094 0.00 0.00	H
ATOM 630 CB ARG 42	49.145 75.927 33.976 0.00 0.00	C
ATOM 631 HB2 ARG 42	49.512 75.037 34.486 0.00 0.00	H
ATOM 632 HB3 ARG 42	49.936 76.677 33.999 0.00 0.00	H
ATOM 633 CG ARG 42	47.944 76.508 34.727 0.00 0.00	C
ATOM 634 HG2 ARG 42	47.595 77.397 34.202 0.00 0.00	H
ATOM 635 HG3 ARG 42	47.139 75.775 34.782 0.00 0.00	H
ATOM 636 CD ARG 42	48.404 76.910 36.138 0.00 0.00	C
ATOM 637 HD2 ARG 42	48.835 76.034 36.623 0.00 0.00	H
ATOM 638 HD3 ARG 42	49.193 77.658 36.063 0.00 0.00	H
ATOM 639 NE ARG 42	47.293 77.413 36.955 0.00 0.00	N
ATOM 640 HE ARG 42	46.777 76.727 37.486 0.00 0.00	H
ATOM 641 CZ ARG 42	46.901 78.672 37.081 0.00 0.00	C
ATOM 642 NH1 ARG 42	47.468 79.672 36.445 0.00 0.00	N
ATOM 643 1HH1 ARG 42	48.227 79.514 35.797 0.00 0.00	H
ATOM 644 2HH1 ARG 42	47.040 80.583 36.514 0.00 0.00	H
ATOM 645 NH2 ARG 42	45.898 78.965 37.872 0.00 0.00	N
ATOM 646 1HH2 ARG 42	45.406 78.223 38.350 0.00 0.00	H
ATOM 647 2HH2 ARG 42	45.615 79.928 37.985 0.00 0.00	H
ATOM 648 C ARG 42	50.161 75.516 31.732 0.00 0.00	C
ATOM 649 O ARG 42	50.612 76.508 31.166 0.00 0.00	O
ATOM 650 N SER 43	50.771 74.333 31.708 0.00 0.00	N
ATOM 651 H SER 43	50.355 73.584 32.243 0.00 0.00	H
ATOM 652 CA SER 43	52.111 74.111 31.168 0.00 0.00	C
ATOM 653 HA SER 43	52.593 75.061 30.937 0.00 0.00	H
ATOM 654 CB SER 43	52.951 73.407 32.244 0.00 0.00	C
ATOM 655 HB2 SER 43	52.536 72.417 32.430 0.00 0.00	H
ATOM 656 HB3 SER 43	53.976 73.300 31.889 0.00 0.00	H
ATOM 657 OG SER 43	52.948 74.140 33.463 0.00 0.00	O
ATOM 658 HG SER 43	53.323 73.582 34.148 0.00 0.00	H
ATOM 659 C SER 43	52.130 73.243 29.903 0.00 0.00	C
ATOM 660 O SER 43	53.013 73.409 29.067 0.00 0.00	O
ATOM 661 N LYS 44	51.187 72.305 29.754 0.00 0.00	N
ATOM 662 H LYS 44	50.464 72.242 30.457 0.00 0.00	H
ATOM 663 CA LYS 44	51.234 71.227 28.750 0.00 0.00	C
ATOM 664 HA LYS 44	52.217 71.222 28.278 0.00 0.00	H
ATOM 665 CB LYS 44	51.044 69.870 29.451 0.00 0.00	C
ATOM 666 HB2 LYS 44	50.026 69.822 29.837 0.00 0.00	H
ATOM 667 HB3 LYS 44	51.168 69.087 28.703 0.00 0.00	H
ATOM 668 CG LYS 44	52.021 69.591 30.605 0.00 0.00	C
ATOM 669 HG2 LYS 44	53.043 69.570 30.228 0.00 0.00	H
ATOM 670 HG3 LYS 44	51.936 70.382 31.351 0.00 0.00	H
ATOM 671 CD LYS 44	51.680 68.263 31.301 0.00 0.00	C
ATOM 672 HD2 LYS 44	52.201 68.235 32.258 0.00 0.00	H
ATOM 673 HD3 LYS 44	50.611 68.228 31.512 0.00 0.00	H
ATOM 674 CE LYS 44	52.108 67.048 30.487 0.00 0.00	C
ATOM 675 HE2 LYS 44	51.709 67.131 29.477 0.00 0.00	H
ATOM 676 HE3 LYS 44	53.195 67.045 30.408 0.00 0.00	H
ATOM 677 NZ LYS 44	51.650 65.787 31.094 0.00 0.00	N
ATOM 678 HZ1 LYS 44	50.654 65.662 30.981 0.00 0.00	H
ATOM 679 HZ2 LYS 44	52.108 64.997 30.661 0.00 0.00	H
ATOM 680 HZ3 LYS 44	51.847 65.730 32.083 0.00 0.00	H
ATOM 681 C LYS 44	50.190 71.396 27.620 0.00 0.00	C
ATOM 682 O LYS 44	49.149 72.014 27.839 0.00 0.00	O
ATOM 683 N ASN 45	50.402 70.794 26.444 0.00 0.00	N
ATOM 684 H ASN 45	51.303 70.364 26.290 0.00 0.00	H
ATOM 685 CA ASN 45	49.377 70.671 25.398 0.00 0.00	C
ATOM 686 HA ASN 45	48.795 71.593 25.382 0.00 0.00	H
ATOM 687 CB ASN 45	50.062 70.523 24.032 0.00 0.00	C
ATOM 688 HB2 ASN 45	50.737 71.361 23.859 0.00 0.00	H
ATOM 689 HB3 ASN 45	50.655 69.608 24.023 0.00 0.00	H
ATOM 690 CG ASN 45	49.076 70.447 22.873 0.00 0.00	C
ATOM 691 OD1 ASN 45	47.869 70.605 23.028 0.00 0.00	O
ATOM 692 ND2 ASN 45	49.583 70.183 21.686 0.00 0.00	N
ATOM 693 1HD2 ASN 45	48.982 70.145 20.875 0.00 0.00	H
ATOM 694 2HD2 ASN 45	50.583 70.132 21.557 0.00 0.00	H
ATOM 695 C ASN 45	48.415 69.508 25.736 0.00 0.00	C
ATOM 696 O ASN 45	48.600 68.378 25.277 0.00 0.00	O
ATOM 697 N VAL 46	47.437 69.761 26.612 0.00 0.00	N
ATOM 698 H VAL 46	47.214 70.733 26.777 0.00 0.00	H
ATOM 699 CA VAL 46	46.691 68.754 27.385 0.00 0.00	C
ATOM 700 HA VAL 46	46.499 67.896 26.740 0.00 0.00	H
ATOM 701 CB VAL 46	47.483 68.280 28.635 0.00 0.00	C
ATOM 702 HB VAL 46	47.803 69.161 29.191 0.00 0.00	H
ATOM 703 CG1 VAL 46	46.647 67.414 29.592 0.00 0.00	C
ATOM 704 1HG1 VAL 46	47.254 67.124 30.449 0.00 0.00	H
ATOM 705 2HG1 VAL 46	45.783 67.965 29.965 0.00 0.00	H
ATOM 706 3HG1 VAL 46	46.317 66.524 29.056 0.00 0.00	H
ATOM 707 CG2 VAL 46	48.737 67.469 28.263 0.00 0.00	C
ATOM 708 1HG2 VAL 46	49.438 68.098 27.714 0.00 0.00	H
ATOM 709 2HG2 VAL 46	49.244 67.119 29.162 0.00 0.00	H
ATOM 710 3HG2 VAL 46	48.459 66.610 27.652 0.00 0.00	H
ATOM 711 C VAL 46	45.347 69.348 27.820 0.00 0.00	C
ATOM 712 O VAL 46	45.295 70.461 28.341 0.00 0.00	O
ATOM 713 N HIE 47	44.263 68.593 27.606 0.00 0.00	N
ATOM 714 H HIE 47	44.389 67.685 27.184 0.00 0.00	H
ATOM 715 CA HIE 47	42.895 69.117 27.607 0.00 0.00	C
ATOM 716 HA HIE 47	42.886 70.159 27.924 0.00 0.00	H
ATOM 717 CB HIE 47	42.393 69.061 26.150 0.00 0.00	C
ATOM 718 HB2 HIE 47	42.372 68.024 25.814 0.00 0.00	H
ATOM 719 HB3 HIE 47	41.372 69.442 26.127 0.00 0.00	H
ATOM 720 CG HIE 47	43.219 69.843 25.153 0.00 0.00	C
ATOM 721 ND1 HIE 47	42.887 71.094 24.624 0.00 0.00	N
ATOM 722 CE1 HIE 47	43.927 71.459 23.852 0.00 0.00	C
ATOM 723 HE1 HIE 47	44.015 72.401 23.331 0.00 0.00	H
ATOM 724 NE2 HIE 47	44.884 70.510 23.868 0.00 0.00	N
ATOM 725 HE2 HIE 47	45.789 70.597 23.429 0.00 0.00	H
ATOM 726 CD2 HIE 47	44.431 69.473 24.650 0.00 0.00	C
ATOM 727 HD2 HIE 47	44.951 68.559 24.897 0.00 0.00	H
ATOM 728 C HIE 47	41.965 68.315 28.552 0.00 0.00	C
ATOM 729 O HIE 47	41.889 67.087 28.451 0.00 0.00	O
ATOM 730 N LEU 48	41.249 68.987 29.465 0.00 0.00	N
ATOM 731 H LEU 48	41.297 69.996 29.452 0.00 0.00	H
ATOM 732 CA LEU 48	40.293 68.378 30.406 0.00 0.00	C
ATOM 733 HA LEU 48	40.581 67.339 30.567 0.00 0.00	H
ATOM 734 CB LEU 48	40.358 69.104 31.768 0.00 0.00	C
ATOM 735 HB2 LEU 48	41.365 68.998 32.173 0.00 0.00	H
ATOM 736 HB3 LEU 48	40.188 70.164 31.581 0.00 0.00	H
ATOM 737 CG LEU 48	39.322 68.630 32.814 0.00 0.00	C
ATOM 738 HG LEU 48	38.317 68.715 32.399 0.00 0.00	H
ATOM 739 CD1 LEU 48	39.539 67.176 33.250 0.00 0.00	C
ATOM 740 1HD1 LEU 48	39.475 66.510 32.389 0.00 0.00	H
ATOM 741 2HD1 LEU 48	40.515 67.070 33.724 0.00 0.00	H
ATOM 742 3HD1 LEU 48	38.766 66.890 33.962 0.00 0.00	H
ATOM 743 CD2 LEU 48	39.378 69.537 34.054 0.00 0.00	C
ATOM 744 1HD2 LEU 48	39.068 70.548 33.791 0.00 0.00	H
ATOM 745 2HD2 LEU 48	38.702 69.166 34.825 0.00 0.00	H
ATOM 746 3HD2 LEU 48	40.393 69.571 34.448 0.00 0.00	H
ATOM 747 C LEU 48	38.859 68.362 29.843 0.00 0.00	C
ATOM 748 O LEU 48	38.231 69.410 29.656 0.00 0.00	O
ATOM 749 N TYR 49	38.335 67.152 29.673 0.00 0.00	N
ATOM 750 H TYR 49	38.932 66.357 29.852 0.00 0.00	H
ATOM 751 CA TYR 49	36.936 66.841 29.427 0.00 0.00	C
ATOM 752 HA TYR 49	36.422 67.746 29.104 0.00 0.00	H
ATOM 753 CB TYR 49	36.823 65.791 28.307 0.00 0.00	C
ATOM 754 HB2 TYR 49	37.488 64.952 28.513 0.00 0.00	H
ATOM 755 HB3 TYR 49	35.797 65.425 28.312 0.00 0.00	H
ATOM 756 CG TYR 49	37.166 66.276 26.907 0.00 0.00	C
ATOM 757 CD1 TYR 49	38.495 66.599 26.556 0.00 0.00	C
ATOM 758 HD1 TYR 49	39.285 66.492 27.284 0.00 0.00	H
ATOM 759 CE1 TYR 49	38.795 67.049 25.259 0.00 0.00	C
ATOM 760 HE1 TYR 49	39.810 67.310 24.998 0.00 0.00	H
ATOM 761 CZ TYR 49	37.773 67.126 24.298 0.00 0.00	C
ATOM 762 OH TYR 49	38.035 67.625 23.064 0.00 0.00	O
ATOM 763 HH TYR 49	38.929 67.956 22.949 0.00 0.00	H
ATOM 764 CE2 TYR 49	36.453 66.762 24.631 0.00 0.00	C
ATOM 765 HE2 TYR 49	35.676 66.846 23.885 0.00 0.00	H
ATOM 766 CD2 TYR 49	36.147 66.355 25.938 0.00 0.00	C
ATOM 767 HD2 TYR 49	35.126 66.110 26.192 0.00 0.00	H
ATOM 768 C TYR 49	36.240 66.352 30.715 0.00 0.00	C
ATOM 769 O TYR 49	36.832 65.624 31.517 0.00 0.00	O
ATOM 770 N ARG 50	34.975 66.749 30.902 0.00 0.00	N
ATOM 771 H ARG 50	34.551 67.326 30.190 0.00 0.00	H
ATOM 772 CA ARG 50	34.155 66.384 32.065 0.00 0.00	C
ATOM 773 HA ARG 50	34.666 65.628 32.662 0.00 0.00	H
ATOM 774 CB ARG 50	33.930 67.632 32.948 0.00 0.00	C
ATOM 775 HB2 ARG 50	33.572 68.452 32.326 0.00 0.00	H
ATOM 776 HB3 ARG 50	33.144 67.429 33.675 0.00 0.00	H
ATOM 777 CG ARG 50	35.188 68.104 33.704 0.00 0.00	C
ATOM 778 HG2 ARG 50	36.031 68.137 33.015 0.00 0.00	H
ATOM 779 HG3 ARG 50	35.005 69.117 34.064 0.00 0.00	H
ATOM 780 CD ARG 50	35.576 67.277 34.932 0.00 0.00	C
ATOM 781 HD2 ARG 50	35.643 66.222 34.668 0.00 0.00	H
ATOM 782 HD3 ARG 50	36.567 67.602 35.249 0.00 0.00	H
ATOM 783 NE ARG 50	34.650 67.503 36.055 0.00 0.00	N
ATOM 784 HE ARG 50	34.732 68.395 36.522 0.00 0.00	H
ATOM 785 CZ ARG 50	33.596 66.781 36.391 0.00 0.00	C
ATOM 786 NH1 ARG 50	33.329 65.621 35.835 0.00 0.00	N
ATOM 787 1HH1 ARG 50	34.025 65.140 35.283 0.00 0.00	H
ATOM 788 2HH1 ARG 50	32.448 65.180 36.057 0.00 0.00	H
ATOM 789 NH2 ARG 50	32.782 67.232 37.318 0.00 0.00	N
ATOM 790 1HH2 ARG 50	33.003 68.094 37.796 0.00 0.00	H
ATOM 791 2HH2 ARG 50	31.982 66.688 37.607 0.00 0.00	H
ATOM 792 C ARG 50	32.813 65.778 31.632 0.00 0.00	C
ATOM 793 O ARG 50	32.348 66.040 30.522 0.00 0.00	O
ATOM 794 N GLN 51	32.213 64.997 32.523 0.00 0.00	N
ATOM 795 H GLN 51	32.721 64.799 33.372 0.00 0.00	H
ATOM 796 CA GLN 51	30.831 64.485 32.508 0.00 0.00	C
ATOM 797 HA GLN 51	30.131 65.317 32.435 0.00 0.00	H
ATOM 798 CB GLN 51	30.606 63.516 31.336 0.00 0.00	C
ATOM 799 HB2 GLN 51	30.893 63.988 30.396 0.00 0.00	H
ATOM 800 HB3 GLN 51	31.227 62.635 31.496 0.00 0.00	H
ATOM 801 CG GLN 51	29.143 63.085 31.221 0.00 0.00	C
ATOM 802 HG2 GLN 51	28.826 62.612 32.150 0.00 0.00	H
ATOM 803 HG3 GLN 51	28.544 63.985 31.076 0.00 0.00	H
ATOM 804 CD GLN 51	28.848 62.098 30.092 0.00 0.00	C
ATOM 805 OE1 GLN 51	27.717 61.669 29.920 0.00 0.00	O
ATOM 806 NE2 GLN 51	29.794 61.693 29.273 0.00 0.00	N
ATOM 807 1HE2 GLN 51	29.536 61.063 28.527 0.00 0.00	H
ATOM 808 2HE2 GLN 51	30.757 61.971 29.402 0.00 0.00	H
ATOM 809 C GLN 51	30.602 63.776 33.852 0.00 0.00	C
ATOM 810 O GLN 51	31.461 63.001 34.264 0.00 0.00	O
ATOM 811 N GLY 52	29.490 64.034 34.553 0.00 0.00	N
ATOM 812 H GLY 52	28.803 64.670 34.174 0.00 0.00	H
ATOM 813 CA GLY 52	29.267 63.485 35.903 0.00 0.00	C
ATOM 814 HA2 GLY 52	28.330 63.855 36.320 0.00 0.00	H
ATOM 815 HA3 GLY 52	29.215 62.398 35.848 0.00 0.00	H
ATOM 816 C GLY 52	30.420 63.864 36.843 0.00 0.00	C
ATOM 817 O GLY 52	30.811 65.022 36.914 0.00 0.00	O
ATOM 818 N GLU 53	31.026 62.903 37.528 0.00 0.00	N
ATOM 819 H GLU 53	30.663 61.963 37.456 0.00 0.00	H
ATOM 820 CA GLU 53	32.286 63.086 38.270 0.00 0.00	C
ATOM 821 HA GLU 53	32.351 64.109 38.640 0.00 0.00	H
ATOM 822 CB GLU 53	32.322 62.161 39.498 0.00 0.00	C
ATOM 823 HB2 GLU 53	32.259 61.121 39.176 0.00 0.00	H
ATOM 824 HB3 GLU 53	33.280 62.321 39.991 0.00 0.00	H
ATOM 825 CG GLU 53	31.217 62.425 40.522 0.00 0.00	C
ATOM 826 HG2 GLU 53	31.221 63.481 40.795 0.00 0.00	H
ATOM 827 HG3 GLU 53	30.246 62.175 40.094 0.00 0.00	H
ATOM 828 CD GLU 53	31.475 61.590 41.767 0.00 0.00	C
ATOM 829 OE1 GLU 53	30.815 60.550 41.978 0.00 0.00	O
ATOM 830 OE2 GLU 53	32.360 61.969 42.566 0.00 0.00	O
ATOM 831 C GLU 53	33.540 62.812 37.425 0.00 0.00	C
ATOM 832 O GLU 53	34.649 63.057 37.903 0.00 0.00	O
ATOM 833 N ILE 54	33.422 62.278 36.205 0.00 0.00	N
ATOM 834 H ILE 54	32.493 62.199 35.798 0.00 0.00	H
ATOM 835 CA ILE 54	34.556 61.783 35.404 0.00 0.00	C
ATOM 836 HA ILE 54	35.133 61.091 36.019 0.00 0.00	H
ATOM 837 CB ILE 54	34.065 61.021 34.145 0.00 0.00	C
ATOM 838 HB ILE 54	33.568 61.740 33.493 0.00 0.00	H
ATOM 839 CG2 ILE 54	35.273 60.423 33.391 0.00 0.00	C
ATOM 840 1HG2 ILE 54	35.846 59.773 34.055 0.00 0.00	H
ATOM 841 2HG2 ILE 54	34.947 59.843 32.529 0.00 0.00	H
ATOM 842 3HG2 ILE 54	35.923 61.216 33.023 0.00 0.00	H
ATOM 843 CG1 ILE 54	33.060 59.895 34.481 0.00 0.00	C
ATOM 844 2HG1 ILE 54	33.601 59.057 34.920 0.00 0.00	H
ATOM 845 3HG1 ILE 54	32.338 60.256 35.208 0.00 0.00	H
ATOM 846 CD1 ILE 54	32.236 59.396 33.289 0.00 0.00	C
ATOM 847 1HD1 ILE 54	31.662 60.220 32.865 0.00 0.00	H
ATOM 848 2HD1 ILE 54	32.885 58.972 32.527 0.00 0.00	H
ATOM 849 3HD1 ILE 54	31.544 58.624 33.628 0.00 0.00	H
ATOM 850 C ILE 54	35.482 62.934 34.992 0.00 0.00	C
ATOM 851 O ILE 54	35.024 63.898 34.369 0.00 0.00	O
ATOM 852 N ASN 55	36.782 62.797 35.269 0.00 0.00	N
ATOM 853 H ASN 55	37.061 61.985 35.801 0.00 0.00	H
ATOM 854 CA ASN 55	37.841 63.622 34.693 0.00 0.00	C
ATOM 855 HA ASN 55	37.409 64.534 34.280 0.00 0.00	H
ATOM 856 CB ASN 55	38.866 64.035 35.760 0.00 0.00	C
ATOM 857 HB2 ASN 55	39.407 63.148 36.089 0.00 0.00	H
ATOM 858 HB3 ASN 55	39.583 64.734 35.329 0.00 0.00	H
ATOM 859 CG ASN 55	38.217 64.684 36.979 0.00 0.00	C
ATOM 860 OD1 ASN 55	37.627 65.759 36.901 0.00 0.00	O
ATOM 861 ND2 ASN 55	38.277 64.041 38.127 0.00 0.00	N
ATOM 862 1HD2 ASN 55	37.744 64.397 38.907 0.00 0.00	H
ATOM 863 2HD2 ASN 55	38.786 63.172 38.209 0.00 0.00	H
ATOM 864 C ASN 55	38.511 62.822 33.558 0.00 0.00	C
ATOM 865 O ASN 55	39.189 61.821 33.810 0.00 0.00	O
ATOM 866 N LEU 56	38.313 63.248 32.313 0.00 0.00	N
ATOM 867 H LEU 56	37.758 64.079 32.170 0.00 0.00	H
ATOM 868 CA LEU 56	38.836 62.598 31.106 0.00 0.00	C
ATOM 869 HA LEU 56	39.332 61.662 31.363 0.00 0.00	H
ATOM 870 CB LEU 56	37.623 62.271 30.195 0.00 0.00	C
ATOM 871 HB2 LEU 56	36.857 61.809 30.817 0.00 0.00	H
ATOM 872 HB3 LEU 56	37.200 63.198 29.806 0.00 0.00	H
ATOM 873 CG LEU 56	37.892 61.302 29.033 0.00 0.00	C
ATOM 874 HG LEU 56	38.272 60.368 29.448 0.00 0.00	H
ATOM 875 CD1 LEU 56	36.567 61.007 28.318 0.00 0.00	C
ATOM 876 1HD1 LEU 56	36.139 61.923 27.908 0.00 0.00	H
ATOM 877 2HD1 LEU 56	36.730 60.285 27.518 0.00 0.00	H
ATOM 878 3HD1 LEU 56	35.857 60.590 29.032 0.00 0.00	H
ATOM 879 CD2 LEU 56	38.901 61.826 28.004 0.00 0.00	C
ATOM 880 1HD2 LEU 56	39.899 61.845 28.443 0.00 0.00	H
ATOM 881 2HD2 LEU 56	38.937 61.144 27.154 0.00 0.00	H
ATOM 882 3HD2 LEU 56	38.630 62.824 27.661 0.00 0.00	H
ATOM 883 C LEU 56	39.871 63.541 30.489 0.00 0.00	C
ATOM 884 O LEU 56	39.535 64.646 30.072 0.00 0.00	O
ATOM 885 N ILE 57	41.133 63.134 30.443 0.00 0.00	N
ATOM 886 H ILE 57	41.362 62.215 30.795 0.00 0.00	H
ATOM 887 CA ILE 57	42.209 63.926 29.848 0.00 0.00	C
ATOM 888 HA ILE 57	41.902 64.971 29.812 0.00 0.00	H
ATOM 889 CB ILE 57	43.486 63.849 30.709 0.00 0.00	C
ATOM 890 HB ILE 57	43.831 62.815 30.739 0.00 0.00	H
ATOM 891 CG2 ILE 57	44.597 64.679 30.058 0.00 0.00	C
ATOM 892 1HG2 ILE 57	44.239 65.689 29.858 0.00 0.00	H
ATOM 893 2HG2 ILE 57	45.456 64.726 30.727 0.00 0.00	H
ATOM 894 3HG2 ILE 57	44.930 64.217 29.129 0.00 0.00	H
ATOM 895 CG1 ILE 57	43.262 64.265 32.175 0.00 0.00	C
ATOM 896 2HG1 ILE 57	42.546 63.587 32.639 0.00 0.00	H
ATOM 897 3HG1 ILE 57	44.205 64.140 32.708 0.00 0.00	H
ATOM 898 CD1 ILE 57	42.762 65.707 32.365 0.00 0.00	C
ATOM 899 1HD1 ILE 57	41.812 65.850 31.851 0.00 0.00	H
ATOM 900 2HD1 ILE 57	42.611 65.890 33.428 0.00 0.00	H
ATOM 901 3HD1 ILE 57	43.491 66.423 31.984 0.00 0.00	H
ATOM 902 C ILE 57	42.451 63.475 28.406 0.00 0.00	C
ATOM 903 O ILE 57	42.868 62.347 28.159 0.00 0.00	O
ATOM 904 N LEU 58	42.237 64.376 27.457 0.00 0.00	N
ATOM 905 H LEU 58	41.895 65.283 27.741 0.00 0.00	H
ATOM 906 CA LEU 58	42.752 64.255 26.099 0.00 0.00	C
ATOM 907 HA LEU 58	42.843 63.198 25.849 0.00 0.00	H
ATOM 908 CB LEU 58	41.742 64.911 25.143 0.00 0.00	C
ATOM 909 HB2 LEU 58	40.749 64.565 25.430 0.00 0.00	H
ATOM 910 HB3 LEU 58	41.773 65.992 25.280 0.00 0.00	H
ATOM 911 CG LEU 58	41.931 64.593 23.646 0.00 0.00	C
ATOM 912 HG LEU 58	41.893 63.512 23.512 0.00 0.00	H
ATOM 913 CD1 LEU 58	40.758 65.206 22.866 0.00 0.00	C
ATOM 914 1HD1 LEU 58	40.756 66.290 22.977 0.00 0.00	H
ATOM 915 2HD1 LEU 58	40.870 64.957 21.811 0.00 0.00	H
ATOM 916 3HD1 LEU 58	39.810 64.802 23.222 0.00 0.00	H
ATOM 917 CD2 LEU 58	43.249 65.104 23.052 0.00 0.00	C
ATOM 918 1HD2 LEU 58	44.088 64.562 23.488 0.00 0.00	H
ATOM 919 2HD2 LEU 58	43.271 64.945 21.974 0.00 0.00	H
ATOM 920 3HD2 LEU 58	43.353 66.170 23.254 0.00 0.00	H
ATOM 921 C LEU 58	44.153 64.881 26.106 0.00 0.00	C
ATOM 922 O LEU 58	44.308 66.098 25.989 0.00 0.00	O
ATOM 923 N ASN 59	45.175 64.038 26.265 0.00 0.00	N
ATOM 924 H ASN 59	44.983 63.049 26.326 0.00 0.00	H
ATOM 925 CA ASN 59	46.560 64.443 26.075 0.00 0.00	C
ATOM 926 HA ASN 59	46.736 65.382 26.599 0.00 0.00	H
ATOM 927 CB ASN 59	47.511 63.382 26.659 0.00 0.00	C
ATOM 928 HB2 ASN 59	47.284 63.285 27.721 0.00 0.00	H
ATOM 929 HB3 ASN 59	47.347 62.409 26.197 0.00 0.00	H
ATOM 930 CG ASN 59	48.977 63.764 26.495 0.00 0.00	C
ATOM 931 OD1 ASN 59	49.458 63.960 25.384 0.00 0.00	O
ATOM 932 ND2 ASN 59	49.704 63.881 27.575 0.00 0.00	N
ATOM 933 1HD2 ASN 59	50.665 64.182 27.491 0.00 0.00	H
ATOM 934 2HD2 ASN 59	49.299 63.615 28.461 0.00 0.00	H
ATOM 935 C ASN 59	46.801 64.661 24.579 0.00 0.00	C
ATOM 936 O ASN 59	46.561 63.767 23.767 0.00 0.00	O
ATOM 937 N ASN 60	47.265 65.852 24.213 0.00 0.00	N
ATOM 938 H ASN 60	47.450 66.542 24.927 0.00 0.00	H
ATOM 939 CA ASN 60	47.470 66.242 22.821 0.00 0.00	C
ATOM 940 HA ASN 60	47.102 65.458 22.159 0.00 0.00	H
ATOM 941 CB ASN 60	46.597 67.473 22.590 0.00 0.00	C
ATOM 942 HB2 ASN 60	45.586 67.248 22.932 0.00 0.00	H
ATOM 943 HB3 ASN 60	46.983 68.298 23.189 0.00 0.00	H
ATOM 944 CG ASN 60	46.493 67.885 21.135 0.00 0.00	C
ATOM 945 OD1 ASN 60	46.318 67.062 20.251 0.00 0.00	O
ATOM 946 ND2 ASN 60	46.586 69.157 20.832 0.00 0.00	N
ATOM 947 1HD2 ASN 60	46.470 69.436 19.869 0.00 0.00	H
ATOM 948 2HD2 ASN 60	46.803 69.849 21.535 0.00 0.00	H
ATOM 949 C ASN 60	48.959 66.463 22.469 0.00 0.00	C
ATOM 950 O ASN 60	49.279 66.768 21.323 0.00 0.00	O
ATOM 951 N GLU 61	49.870 66.245 23.423 0.00 0.00	N
ATOM 952 H GLU 61	49.547 65.900 24.316 0.00 0.00	H
ATOM 953 CA GLU 61	51.310 66.487 23.306 0.00 0.00	C
ATOM 954 HA GLU 61	51.467 67.553 23.139 0.00 0.00	H
ATOM 955 CB GLU 61	52.029 66.104 24.605 0.00 0.00	C
ATOM 956 HB2 GLU 61	52.000 65.022 24.726 0.00 0.00	H
ATOM 957 HB3 GLU 61	53.076 66.397 24.528 0.00 0.00	H
ATOM 958 CG GLU 61	51.429 66.743 25.862 0.00 0.00	C
ATOM 959 HG2 GLU 61	51.400 67.826 25.749 0.00 0.00	H
ATOM 960 HG3 GLU 61	50.410 66.389 26.018 0.00 0.00	H
ATOM 961 CD GLU 61	52.268 66.355 27.073 0.00 0.00	C
ATOM 962 OE1 GLU 61	53.009 67.215 27.599 0.00 0.00	O
ATOM 963 OE2 GLU 61	52.223 65.168 27.473 0.00 0.00	O
ATOM 964 C GLU 61	51.937 65.673 22.156 0.00 0.00	C
ATOM 965 O GLU 61	51.834 64.446 22.174 0.00 0.00	O
ATOM 966 N PRO 62	52.605 66.291 21.166 0.00 0.00	N
ATOM 967 CD PRO 62	52.534 67.702 20.827 0.00 0.00	C
ATOM 968 HD2 PRO 62	53.303 68.253 21.369 0.00 0.00	H
ATOM 969 HD3 PRO 62	51.550 68.121 21.039 0.00 0.00	H
ATOM 970 CG PRO 62	52.806 67.756 19.328 0.00 0.00	C
ATOM 971 HG2 PRO 62	53.240 68.710 19.030 0.00 0.00	H
ATOM 972 HG3 PRO 62	51.877 67.577 18.786 0.00 0.00	H
ATOM 973 CB PRO 62	53.772 66.598 19.115 0.00 0.00	C
ATOM 974 HB2 PRO 62	54.783 66.930 19.350 0.00 0.00	H
ATOM 975 HB3 PRO 62	53.718 66.219 18.094 0.00 0.00	H
ATOM 976 CA PRO 62	53.300 65.546 20.115 0.00 0.00	C
ATOM 977 HA PRO 62	52.584 64.890 19.622 0.00 0.00	H
ATOM 978 C PRO 62	54.474 64.691 20.611 0.00 0.00	C
ATOM 979 O PRO 62	54.753 63.675 19.983 0.00 0.00	O
ATOM 980 N ASN 63	55.163 65.084 21.695 0.00 0.00	N
ATOM 981 H ASN 63	54.908 65.951 22.145 0.00 0.00	H
ATOM 982 CA ASN 63	56.378 64.396 22.149 0.00 0.00	C
ATOM 983 HA ASN 63	56.343 63.364 21.799 0.00 0.00	H
ATOM 984 CB ASN 63	57.591 65.053 21.484 0.00 0.00	C
ATOM 985 HB2 ASN 63	57.363 65.266 20.439 0.00 0.00	H
ATOM 986 HB3 ASN 63	57.821 65.997 21.978 0.00 0.00	H
ATOM 987 CG ASN 63	58.817 64.148 21.537 0.00 0.00	C
ATOM 988 OD1 ASN 63	59.626 64.204 22.460 0.00 0.00	O
ATOM 989 ND2 ASN 63	58.970 63.281 20.553 0.00 0.00	N
ATOM 990 1HD2 ASN 63	59.730 62.616 20.581 0.00 0.00	H
ATOM 991 2HD2 ASN 63	58.292 63.227 19.807 0.00 0.00	H
ATOM 992 C ASN 63	56.496 64.341 23.686 0.00 0.00	C
ATOM 993 O ASN 63	57.141 65.176 24.314 0.00 0.00	O
ATOM 994 N SER 64	55.877 63.328 24.300 0.00 0.00	N
ATOM 995 H SER 64	55.240 62.767 23.752 0.00 0.00	H
ATOM 996 CA SER 64	55.960 63.026 25.738 0.00 0.00	C
ATOM 997 HA SER 64	56.937 63.328 26.116 0.00 0.00	H
ATOM 998 CB SER 64	54.877 63.811 26.488 0.00 0.00	C
ATOM 999 HB2 SER 64	55.107 63.815 27.554 0.00 0.00	H
ATOM 1000 HB3 SER 64	54.871 64.845 26.143 0.00 0.00	H
ATOM 1001 OG SER 64	53.587 63.251 26.321 0.00 0.00	O
ATOM 1002 HG SER 64	52.978 63.898 26.684 0.00 0.00	H
ATOM 1003 C SER 64	55.828 61.510 26.001 0.00 0.00	C
ATOM 1004 O SER 64	55.657 60.724 25.065 0.00 0.00	O
ATOM 1005 N ILE 65	55.865 61.086 27.265 0.00 0.00	N
ATOM 1006 H ILE 65	56.084 61.762 27.983 0.00 0.00	H
ATOM 1007 CA ILE 65	55.666 59.677 27.684 0.00 0.00	C
ATOM 1008 HA ILE 65	56.460 59.081 27.232 0.00 0.00	H
ATOM 1009 CB ILE 65	55.822 59.610 29.227 0.00 0.00	C
ATOM 1010 HB ILE 65	56.765 60.098 29.477 0.00 0.00	H
ATOM 1011 CG2 ILE 65	54.696 60.377 29.952 0.00 0.00	C
ATOM 1012 1HG2 ILE 65	54.545 61.369 29.527 0.00 0.00	H
ATOM 1013 2HG2 ILE 65	53.749 59.841 29.885 0.00 0.00	H
ATOM 1014 3HG2 ILE 65	54.951 60.504 31.004 0.00 0.00	H
ATOM 1015 CG1 ILE 65	55.923 58.149 29.714 0.00 0.00	C
ATOM 1016 2HG1 ILE 65	54.961 57.652 29.591 0.00 0.00	H
ATOM 1017 3HG1 ILE 65	56.647 57.618 29.096 0.00 0.00	H
ATOM 1018 CD1 ILE 65	56.352 58.032 31.185 0.00 0.00	C
ATOM 1019 1HD1 ILE 65	55.622 58.509 31.839 0.00 0.00	H
ATOM 1020 2HD1 ILE 65	56.413 56.975 31.445 0.00 0.00	H
ATOM 1021 3HD1 ILE 65	57.330 58.489 31.331 0.00 0.00	H
ATOM 1022 C ILE 65	54.344 59.065 27.196 0.00 0.00	C
ATOM 1023 O ILE 65	54.300 57.863 26.914 0.00 0.00	O
ATOM 1024 N ALA 66	53.288 59.882 27.045 0.00 0.00	N
ATOM 1025 H ALA 66	53.415 60.859 27.267 0.00 0.00	H
ATOM 1026 CA ALA 66	52.018 59.477 26.433 0.00 0.00	C
ATOM 1027 HA ALA 66	51.726 58.506 26.834 0.00 0.00	H
ATOM 1028 CB ALA 66	50.952 60.510 26.800 0.00 0.00	C
ATOM 1029 HB1 ALA 66	51.250 61.508 26.478 0.00 0.00	H
ATOM 1030 HB2 ALA 66	50.010 60.247 26.318 0.00 0.00	H
ATOM 1031 HB3 ALA 66	50.794 60.513 27.878 0.00 0.00	H
ATOM 1032 C ALA 66	52.144 59.327 24.915 0.00 0.00	C
ATOM 1033 O ALA 66	51.637 58.368 24.343 0.00 0.00	O
ATOM 1034 N SER 67	52.865 60.233 24.254 0.00 0.00	N
ATOM 1035 H SER 67	53.250 61.032 24.738 0.00 0.00	H
ATOM 1036 CA SER 67	53.158 60.137 22.821 0.00 0.00	C
ATOM 1037 HA SER 67	52.232 59.957 22.274 0.00 0.00	H
ATOM 1038 CB SER 67	53.766 61.444 22.281 0.00 0.00	C
ATOM 1039 HB2 SER 67	54.851 61.348 22.262 0.00 0.00	H
ATOM 1040 HB3 SER 67	53.429 61.601 21.256 0.00 0.00	H
ATOM 1041 OG SER 67	53.443 62.572 23.078 0.00 0.00	O
ATOM 1042 HG SER 67	52.860 63.168 22.602 0.00 0.00	H
ATOM 1043 C SER 67	54.100 58.963 22.511 0.00 0.00	C
ATOM 1044 O SER 67	54.064 58.438 21.404 0.00 0.00	O
ATOM 1045 N TYR 68	54.949 58.523 23.447 0.00 0.00	N
ATOM 1046 H TYR 68	55.018 59.027 24.319 0.00 0.00	H
ATOM 1047 CA TYR 68	55.793 57.335 23.257 0.00 0.00	C
ATOM 1048 HA TYR 68	56.205 57.370 22.249 0.00 0.00	H
ATOM 1049 CB TYR 68	56.979 57.324 24.239 0.00 0.00	C
ATOM 1050 HB2 TYR 68	57.429 58.317 24.275 0.00 0.00	H
ATOM 1051 HB3 TYR 68	56.623 57.090 25.242 0.00 0.00	H
ATOM 1052 CG TYR 68	58.045 56.329 23.809 0.00 0.00	C
ATOM 1053 CD1 TYR 68	58.000 54.996 24.259 0.00 0.00	C
ATOM 1054 HD1 TYR 68	57.244 54.687 24.965 0.00 0.00	H
ATOM 1055 CE1 TYR 68	58.901 54.041 23.751 0.00 0.00	C
ATOM 1056 HE1 TYR 68	58.839 53.011 24.071 0.00 0.00	H
ATOM 1057 CZ TYR 68	59.856 54.413 22.785 0.00 0.00	C
ATOM 1058 OH TYR 68	60.685 53.482 22.257 0.00 0.00	O
ATOM 1059 HH TYR 68	61.254 53.829 21.567 0.00 0.00	H
ATOM 1060 CE2 TYR 68	59.923 55.759 22.351 0.00 0.00	C
ATOM 1061 HE2 TYR 68	60.661 56.052 21.619 0.00 0.00	H
ATOM 1062 CD2 TYR 68	59.018 56.711 22.864 0.00 0.00	C
ATOM 1063 HD2 TYR 68	59.043 57.730 22.506 0.00 0.00	H
ATOM 1064 C TYR 68	54.981 56.040 23.366 0.00 0.00	C
ATOM 1065 O TYR 68	55.278 55.066 22.663 0.00 0.00	O
ATOM 1066 N PHE 69	53.913 56.043 24.173 0.00 0.00	N
ATOM 1067 H PHE 69	53.757 56.865 24.738 0.00 0.00	H
ATOM 1068 CA PHE 69	52.902 54.990 24.179 0.00 0.00	C
ATOM 1069 HA PHE 69	53.404 54.024 24.213 0.00 0.00	H
ATOM 1070 CB PHE 69	52.040 55.117 25.456 0.00 0.00	C
ATOM 1071 HB2 PHE 69	52.688 55.254 26.321 0.00 0.00	H
ATOM 1072 HB3 PHE 69	51.409 56.003 25.403 0.00 0.00	H
ATOM 1073 CG PHE 69	51.163 53.910 25.723 0.00 0.00	C
ATOM 1074 CD1 PHE 69	49.922 53.785 25.074 0.00 0.00	C
ATOM 1075 HD1 PHE 69	49.576 54.551 24.396 0.00 0.00	H
ATOM 1076 CE1 PHE 69	49.128 52.649 25.294 0.00 0.00	C
ATOM 1077 HE1 PHE 69	48.168 52.570 24.805 0.00 0.00	H
ATOM 1078 CZ PHE 69	49.572 51.628 26.151 0.00 0.00	C
ATOM 1079 HZ PHE 69	48.969 50.746 26.313 0.00 0.00	H
ATOM 1080 CE2 PHE 69	50.819 51.739 26.790 0.00 0.00	C
ATOM 1081 HE2 PHE 69	51.166 50.949 27.440 0.00 0.00	H
ATOM 1082 CD2 PHE 69	51.610 52.883 26.578 0.00 0.00	C
ATOM 1083 HD2 PHE 69	52.576 52.963 27.055 0.00 0.00	H
ATOM 1084 C PHE 69	52.080 55.046 22.884 0.00 0.00	C
ATOM 1085 O PHE 69	52.084 54.076 22.125 0.00 0.00	O
ATOM 1086 N ALA 70	51.447 56.186 22.576 0.00 0.00	N
ATOM 1087 H ALA 70	51.482 56.936 23.252 0.00 0.00	H
ATOM 1088 CA ALA 70	50.590 56.362 21.407 0.00 0.00	C
ATOM 1089 HA ALA 70	49.776 55.640 21.477 0.00 0.00	H
ATOM 1090 CB ALA 70	49.966 57.766 21.473 0.00 0.00	C
ATOM 1091 HB1 ALA 70	50.737 58.529 21.364 0.00 0.00	H
ATOM 1092 HB2 ALA 70	49.236 57.887 20.673 0.00 0.00	H
ATOM 1093 HB3 ALA 70	49.463 57.908 22.429 0.00 0.00	H
ATOM 1094 C ALA 70	51.312 56.121 20.062 0.00 0.00	C
ATOM 1095 O ALA 70	50.702 55.555 19.157 0.00 0.00	O
ATOM 1096 N ALA 71	52.595 56.480 19.917 0.00 0.00	N
ATOM 1097 H ALA 71	53.036 57.020 20.648 0.00 0.00	H
ATOM 1098 CA ALA 71	53.371 56.221 18.703 0.00 0.00	C
ATOM 1099 HA ALA 71	52.842 56.652 17.852 0.00 0.00	H
ATOM 1100 CB ALA 71	54.724 56.936 18.806 0.00 0.00	C
ATOM 1101 HB1 ALA 71	54.579 58.014 18.874 0.00 0.00	H
ATOM 1102 HB2 ALA 71	55.266 56.597 19.689 0.00 0.00	H
ATOM 1103 HB3 ALA 71	55.317 56.714 17.919 0.00 0.00	H
ATOM 1104 C ALA 71	53.540 54.720 18.385 0.00 0.00	C
ATOM 1105 O ALA 71	53.710 54.376 17.211 0.00 0.00	O
ATOM 1106 N GLU 72	53.464 53.835 19.387 0.00 0.00	N
ATOM 1107 H GLU 72	53.336 54.198 20.321 0.00 0.00	H
ATOM 1108 CA GLU 72	53.423 52.381 19.204 0.00 0.00	C
ATOM 1109 HA GLU 72	53.901 52.134 18.256 0.00 0.00	H
ATOM 1110 CB GLU 72	54.221 51.733 20.346 0.00 0.00	C
ATOM 1111 HB2 GLU 72	55.172 52.255 20.450 0.00 0.00	H
ATOM 1112 HB3 GLU 72	53.664 51.843 21.277 0.00 0.00	H
ATOM 1113 CG GLU 72	54.509 50.245 20.126 0.00 0.00	C
ATOM 1114 HG2 GLU 72	54.904 49.844 21.059 0.00 0.00	H
ATOM 1115 HG3 GLU 72	53.583 49.713 19.909 0.00 0.00	H
ATOM 1116 CD GLU 72	55.525 50.004 19.015 0.00 0.00	C
ATOM 1117 OE1 GLU 72	55.174 49.407 17.976 0.00 0.00	O
ATOM 1118 OE2 GLU 72	56.697 50.413 19.195 0.00 0.00	O
ATOM 1119 C GLU 72	51.979 51.849 19.208 0.00 0.00	C
ATOM 1120 O GLU 72	51.622 51.011 18.376 0.00 0.00	O
ATOM 1121 N HID 73	51.136 52.317 20.129 0.00 0.00	N
ATOM 1122 H HID 73	51.487 52.982 20.803 0.00 0.00	H
ATOM 1123 CA HID 73	49.856 51.675 20.463 0.00 0.00	C
ATOM 1124 HA HID 73	49.853 50.679 20.020 0.00 0.00	H
ATOM 1125 CB HID 73	49.797 51.501 21.987 0.00 0.00	C
ATOM 1126 HB2 HID 73	49.766 52.485 22.455 0.00 0.00	H
ATOM 1127 HB3 HID 73	48.868 50.989 22.235 0.00 0.00	H
ATOM 1128 CG HID 73	50.961 50.708 22.546 0.00 0.00	C
ATOM 1129 ND1 HID 73	51.358 49.456 22.141 0.00 0.00	N
ATOM 1130 HD1 HID 73	50.877 48.887 21.460 0.00 0.00	H
ATOM 1131 CE1 HID 73	52.474 49.134 22.809 0.00 0.00	C
ATOM 1132 HE1 HID 73	53.017 48.210 22.679 0.00 0.00	H
ATOM 1133 NE2 HID 73	52.835 50.124 23.646 0.00 0.00	N
ATOM 1134 CD2 HID 73	51.874 51.127 23.474 0.00 0.00	C
ATOM 1135 HD2 HID 73	51.874 52.089 23.966 0.00 0.00	H
ATOM 1136 C HID 73	48.608 52.366 19.885 0.00 0.00	C
ATOM 1137 O HID 73	47.511 51.808 19.959 0.00 0.00	O
ATOM 1138 N GLY 74	48.762 53.514 19.220 0.00 0.00	N
ATOM 1139 H GLY 74	49.676 53.942 19.203 0.00 0.00	H
ATOM 1140 CA GLY 74	47.698 54.197 18.475 0.00 0.00	C
ATOM 1141 HA2 GLY 74	48.149 54.848 17.726 0.00 0.00	H
ATOM 1142 HA3 GLY 74	47.091 53.448 17.967 0.00 0.00	H
ATOM 1143 C GLY 74	46.788 55.062 19.357 0.00 0.00	C
ATOM 1144 O GLY 74	47.200 55.443 20.456 0.00 0.00	O
ATOM 1145 N PRO 75	45.578 55.435 18.895 0.00 0.00	N
ATOM 1146 CD PRO 75	45.025 55.163 17.574 0.00 0.00	C
ATOM 1147 HD2 PRO 75	45.202 54.135 17.260 0.00 0.00	H
ATOM 1148 HD3 PRO 75	45.450 55.858 16.850 0.00 0.00	H
ATOM 1149 CG PRO 75	43.518 55.397 17.700 0.00 0.00	C
ATOM 1150 HG2 PRO 75	43.046 54.471 18.029 0.00 0.00	H
ATOM 1151 HG3 PRO 75	43.080 55.738 16.762 0.00 0.00	H
ATOM 1152 CB PRO 75	43.437 56.464 18.794 0.00 0.00	C
ATOM 1153 HB2 PRO 75	42.475 56.452 19.307 0.00 0.00	H
ATOM 1154 HB3 PRO 75	43.613 57.448 18.360 0.00 0.00	H
ATOM 1155 CA PRO 75	44.588 56.100 19.727 0.00 0.00	C
ATOM 1156 HA PRO 75	45.001 57.021 20.138 0.00 0.00	H
ATOM 1157 C PRO 75	44.165 55.163 20.860 0.00 0.00	C
ATOM 1158 O PRO 75	43.622 54.082 20.622 0.00 0.00	O
ATOM 1159 N SER 76	44.495 55.524 22.094 0.00 0.00	N
ATOM 1160 H SER 76	44.967 56.403 22.246 0.00 0.00	H
ATOM 1161 CA SER 76	44.509 54.571 23.218 0.00 0.00	C
ATOM 1162 HA SER 76	43.601 53.970 23.171 0.00 0.00	H
ATOM 1163 CB SER 76	45.708 53.615 23.065 0.00 0.00	C
ATOM 1164 HB2 SER 76	45.742 52.933 23.915 0.00 0.00	H
ATOM 1165 HB3 SER 76	45.573 53.031 22.155 0.00 0.00	H
ATOM 1166 OG SER 76	46.941 54.303 22.988 0.00 0.00	O
ATOM 1167 HG SER 76	46.952 54.849 22.198 0.00 0.00	H
ATOM 1168 C SER 76	44.542 55.269 24.586 0.00 0.00	C
ATOM 1169 O SER 76	44.913 56.440 24.678 0.00 0.00	O
ATOM 1170 N VAL 77	44.171 54.556 25.655 0.00 0.00	N
ATOM 1171 H VAL 77	43.905 53.579 25.513 0.00 0.00	H
ATOM 1172 CA VAL 77	44.417 55.008 27.031 0.00 0.00	C
ATOM 1173 HA VAL 77	44.088 56.045 27.111 0.00 0.00	H
ATOM 1174 CB VAL 77	43.657 54.185 28.092 0.00 0.00	C
ATOM 1175 HB VAL 77	44.012 53.155 28.059 0.00 0.00	H
ATOM 1176 CG1 VAL 77	43.908 54.766 29.498 0.00 0.00	C
ATOM 1177 1HG1 VAL 77	44.952 54.636 29.784 0.00 0.00	H
ATOM 1178 2HG1 VAL 77	43.663 55.827 29.511 0.00 0.00	H
ATOM 1179 3HG1 VAL 77	43.286 54.265 30.239 0.00 0.00	H
ATOM 1180 CG2 VAL 77	42.142 54.167 27.839 0.00 0.00	C
ATOM 1181 1HG2 VAL 77	41.657 53.508 28.556 0.00 0.00	H
ATOM 1182 2HG2 VAL 77	41.743 55.172 27.961 0.00 0.00	H
ATOM 1183 3HG2 VAL 77	41.919 53.801 26.837 0.00 0.00	H
ATOM 1184 C VAL 77	45.923 54.922 27.292 0.00 0.00	C
ATOM 1185 O VAL 77	46.505 53.836 27.268 0.00 0.00	O
ATOM 1186 N CYS 78	46.528 56.080 27.545 0.00 0.00	N
ATOM 1187 H CYS 78	45.924 56.886 27.624 0.00 0.00	H
ATOM 1188 CA CYS 78	47.963 56.308 27.715 0.00 0.00	C
ATOM 1189 HA CYS 78	48.507 55.396 27.468 0.00 0.00	H
ATOM 1190 CB CYS 78	48.369 57.397 26.716 0.00 0.00	C
ATOM 1191 HB2 CYS 78	47.766 58.292 26.869 0.00 0.00	H
ATOM 1192 HB3 CYS 78	49.418 57.656 26.854 0.00 0.00	H
ATOM 1193 SG CYS 78	48.145 56.768 25.025 0.00 0.00	S
ATOM 1194 HG CYS 78	46.838 56.500 25.101 0.00 0.00	H
ATOM 1195 C CYS 78	48.321 56.665 29.169 0.00 0.00	C
ATOM 1196 O CYS 78	49.485 56.951 29.437 0.00 0.00	O
ATOM 1197 N GLY 79	47.355 56.670 30.093 0.00 0.00	N
ATOM 1198 H GLY 79	46.402 56.560 29.776 0.00 0.00	H
ATOM 1199 CA GLY 79	47.575 56.804 31.532 0.00 0.00	C
ATOM 1200 HA2 GLY 79	48.187 55.971 31.877 0.00 0.00	H
ATOM 1201 HA3 GLY 79	48.153 57.707 31.731 0.00 0.00	H
ATOM 1202 C GLY 79	46.287 56.861 32.350 0.00 0.00	C
ATOM 1203 O GLY 79	45.188 56.944 31.803 0.00 0.00	O
ATOM 1204 N MET 80	46.419 56.810 33.674 0.00 0.00	N
ATOM 1205 H MET 80	47.362 56.710 34.039 0.00 0.00	H
ATOM 1206 CA MET 80	45.339 57.046 34.648 0.00 0.00	C
ATOM 1207 HA MET 80	44.735 57.878 34.289 0.00 0.00	H
ATOM 1208 CB MET 80	44.441 55.799 34.775 0.00 0.00	C
ATOM 1209 HB2 MET 80	43.571 56.042 35.387 0.00 0.00	H
ATOM 1210 HB3 MET 80	44.079 55.517 33.786 0.00 0.00	H
ATOM 1211 CG MET 80	45.169 54.607 35.406 0.00 0.00	C
ATOM 1212 HG2 MET 80	46.124 54.472 34.900 0.00 0.00	H
ATOM 1213 HG3 MET 80	45.375 54.831 36.454 0.00 0.00	H
ATOM 1214 SD MET 80	44.270 53.039 35.337 0.00 0.00	S
ATOM 1215 CE MET 80	44.691 52.550 33.645 0.00 0.00	C
ATOM 1216 HE1 MET 80	44.271 51.568 33.436 0.00 0.00	H
ATOM 1217 HE2 MET 80	44.292 53.273 32.932 0.00 0.00	H
ATOM 1218 HE3 MET 80	45.775 52.497 33.534 0.00 0.00	H
ATOM 1219 C MET 80	45.923 57.459 36.002 0.00 0.00	C
ATOM 1220 O MET 80	47.119 57.284 36.224 0.00 0.00	O
ATOM 1221 N ALA 81	45.107 57.981 36.919 0.00 0.00	N
ATOM 1222 H ALA 81	44.141 58.121 36.659 0.00 0.00	H
ATOM 1223 CA ALA 81	45.573 58.512 38.200 0.00 0.00	C
ATOM 1224 HA ALA 81	46.631 58.278 38.315 0.00 0.00	H
ATOM 1225 CB ALA 81	45.455 60.030 38.176 0.00 0.00	C
ATOM 1226 HB1 ALA 81	44.410 60.317 38.056 0.00 0.00	H
ATOM 1227 HB2 ALA 81	45.850 60.458 39.097 0.00 0.00	H
ATOM 1228 HB3 ALA 81	46.028 60.392 37.323 0.00 0.00	H
ATOM 1229 C ALA 81	44.837 57.933 39.407 0.00 0.00	C
ATOM 1230 O ALA 81	43.599 57.879 39.424 0.00 0.00	O
ATOM 1231 N PHE 82	45.616 57.572 40.432 0.00 0.00	N
ATOM 1232 H PHE 82	46.611 57.719 40.346 0.00 0.00	H
ATOM 1233 CA PHE 82	45.143 57.092 41.721 0.00 0.00	C
ATOM 1234 HA PHE 82	44.055 57.037 41.707 0.00 0.00	H
ATOM 1235 CB PHE 82	45.689 55.678 42.003 0.00 0.00	C
ATOM 1236 HB2 PHE 82	46.769 55.757 42.128 0.00 0.00	H
ATOM 1237 HB3 PHE 82	45.275 55.324 42.946 0.00 0.00	H
ATOM 1238 CG PHE 82	45.416 54.612 40.955 0.00 0.00	C
ATOM 1239 CD1 PHE 82	44.250 54.638 40.157 0.00 0.00	C
ATOM 1240 HD1 PHE 82	43.506 55.405 40.309 0.00 0.00	H
ATOM 1241 CE1 PHE 82	44.039 53.649 39.177 0.00 0.00	C
ATOM 1242 HE1 PHE 82	43.160 53.684 38.550 0.00 0.00	H
ATOM 1243 CZ PHE 82	44.976 52.624 39.005 0.00 0.00	C
ATOM 1244 HZ PHE 82	44.818 51.875 38.244 0.00 0.00	H
ATOM 1245 CE2 PHE 82	46.124 52.584 39.807 0.00 0.00	C
ATOM 1246 HE2 PHE 82	46.838 51.784 39.679 0.00 0.00	H
ATOM 1247 CD2 PHE 82	46.345 53.577 40.771 0.00 0.00	C
ATOM 1248 HD2 PHE 82	47.236 53.534 41.379 0.00 0.00	H
ATOM 1249 C PHE 82	45.560 58.062 42.830 0.00 0.00	C
ATOM 1250 O PHE 82	46.722 58.460 42.956 0.00 0.00	O
ATOM 1251 N ARG 83	44.585 58.417 43.663 0.00 0.00	N
ATOM 1252 H ARG 83	43.676 57.994 43.540 0.00 0.00	H
ATOM 1253 CA ARG 83	44.800 59.164 44.894 0.00 0.00	C
ATOM 1254 HA ARG 83	45.459 60.007 44.685 0.00 0.00	H
ATOM 1255 CB ARG 83	43.471 59.708 45.428 0.00 0.00	C
ATOM 1256 HB2 ARG 83	42.784 58.875 45.579 0.00 0.00	H
ATOM 1257 HB3 ARG 83	43.640 60.190 46.390 0.00 0.00	H
ATOM 1258 CG ARG 83	42.830 60.722 44.468 0.00 0.00	C
ATOM 1259 HG2 ARG 83	43.427 61.633 44.441 0.00 0.00	H
ATOM 1260 HG3 ARG 83	42.745 60.298 43.468 0.00 0.00	H
ATOM 1261 CD ARG 83	41.446 61.025 45.018 0.00 0.00	C
ATOM 1262 HD2 ARG 83	40.864 60.104 45.044 0.00 0.00	H
ATOM 1263 HD3 ARG 83	41.550 61.392 46.039 0.00 0.00	H
ATOM 1264 NE ARG 83	40.731 62.034 44.233 0.00 0.00	N
ATOM 1265 HE ARG 83	41.216 62.518 43.492 0.00 0.00	H
ATOM 1266 CZ ARG 83	39.500 62.422 44.503 0.00 0.00	C
ATOM 1267 NH1 ARG 83	38.821 61.951 45.521 0.00 0.00	N
ATOM 1268 1HH1 ARG 83	39.231 61.257 46.130 0.00 0.00	H
ATOM 1269 2HH1 ARG 83	37.862 62.229 45.673 0.00 0.00	H
ATOM 1270 NH2 ARG 83	38.945 63.319 43.738 0.00 0.00	N
ATOM 1271 1HH2 ARG 83	39.438 63.642 42.918 0.00 0.00	H
ATOM 1272 2HH2 ARG 83	38.050 63.706 44.001 0.00 0.00	H
ATOM 1273 C ARG 83	45.424 58.252 45.937 0.00 0.00	C
ATOM 1274 O ARG 83	44.949 57.135 46.129 0.00 0.00	O
ATOM 1275 N VAL 84	46.429 58.737 46.647 0.00 0.00	N
ATOM 1276 H VAL 84	46.750 59.660 46.390 0.00 0.00	H
ATOM 1277 CA VAL 84	47.093 58.070 47.785 0.00 0.00	C
ATOM 1278 HA VAL 84	46.437 57.280 48.151 0.00 0.00	H
ATOM 1279 CB VAL 84	48.447 57.448 47.374 0.00 0.00	C
ATOM 1280 HB VAL 84	48.927 57.066 48.275 0.00 0.00	H
ATOM 1281 CG1 VAL 84	48.322 56.260 46.401 0.00 0.00	C
ATOM 1282 1HG1 VAL 84	47.779 55.434 46.859 0.00 0.00	H
ATOM 1283 2HG1 VAL 84	47.800 56.572 45.497 0.00 0.00	H
ATOM 1284 3HG1 VAL 84	49.311 55.905 46.114 0.00 0.00	H
ATOM 1285 CG2 VAL 84	49.399 58.462 46.731 0.00 0.00	C
ATOM 1286 1HG2 VAL 84	50.363 57.976 46.575 0.00 0.00	H
ATOM 1287 2HG2 VAL 84	49.003 58.793 45.771 0.00 0.00	H
ATOM 1288 3HG2 VAL 84	49.530 59.332 47.374 0.00 0.00	H
ATOM 1289 C VAL 84	47.286 59.075 48.926 0.00 0.00	C
ATOM 1290 O VAL 84	47.160 60.275 48.708 0.00 0.00	O
ATOM 1291 N LYS 85	47.587 58.603 50.140 0.00 0.00	N
ATOM 1292 H LYS 85	47.599 57.603 50.284 0.00 0.00	H
ATOM 1293 CA LYS 85	47.807 59.477 51.298 0.00 0.00	C
ATOM 1294 HA LYS 85	46.895 60.044 51.483 0.00 0.00	H
ATOM 1295 CB LYS 85	48.103 58.592 52.529 0.00 0.00	C
ATOM 1296 HB2 LYS 85	47.359 57.798 52.583 0.00 0.00	H
ATOM 1297 HB3 LYS 85	49.084 58.126 52.428 0.00 0.00	H
ATOM 1298 CG LYS 85	48.055 59.431 53.809 0.00 0.00	C
ATOM 1299 HG2 LYS 85	48.727 60.284 53.720 0.00 0.00	H
ATOM 1300 HG3 LYS 85	47.036 59.792 53.952 0.00 0.00	H
ATOM 1301 CD LYS 85	48.479 58.609 55.028 0.00 0.00	C
ATOM 1302 HD2 LYS 85	47.833 57.738 55.135 0.00 0.00	H
ATOM 1303 HD3 LYS 85	49.509 58.281 54.891 0.00 0.00	H
ATOM 1304 CE LYS 85	48.369 59.456 56.299 0.00 0.00	C
ATOM 1305 HE2 LYS 85	48.920 60.387 56.162 0.00 0.00	H
ATOM 1306 HE3 LYS 85	47.323 59.706 56.475 0.00 0.00	H
ATOM 1307 NZ LYS 85	48.902 58.733 57.469 0.00 0.00	N
ATOM 1308 HZ1 LYS 85	48.423 57.853 57.599 0.00 0.00	H
ATOM 1309 HZ2 LYS 85	49.890 58.560 57.353 0.00 0.00	H
ATOM 1310 HZ3 LYS 85	48.771 59.278 58.309 0.00 0.00	H
ATOM 1311 C LYS 85	48.936 60.496 51.047 0.00 0.00	C
ATOM 1312 O LYS 85	48.734 61.701 51.228 0.00 0.00	O
ATOM 1313 N ASP 86	50.088 60.008 50.586 0.00 0.00	N
ATOM 1314 H ASP 86	50.147 59.004 50.496 0.00 0.00	H
ATOM 1315 CA ASP 86	51.230 60.794 50.121 0.00 0.00	C
ATOM 1316 HA ASP 86	50.892 61.798 49.867 0.00 0.00	H
ATOM 1317 CB ASP 86	52.269 60.912 51.243 0.00 0.00	C
ATOM 1318 HB2 ASP 86	51.763 61.277 52.136 0.00 0.00	H
ATOM 1319 HB3 ASP 86	52.693 59.935 51.476 0.00 0.00	H
ATOM 1320 CG ASP 86	53.392 61.886 50.894 0.00 0.00	C
ATOM 1321 OD1 ASP 86	53.619 62.831 51.678 0.00 0.00	O
ATOM 1322 OD2 ASP 86	54.044 61.755 49.836 0.00 0.00	O
ATOM 1323 C ASP 86	51.835 60.140 48.863 0.00 0.00	C
ATOM 1324 O ASP 86	52.223 58.966 48.865 0.00 0.00	O
ATOM 1325 N SER 87	51.890 60.909 47.779 0.00 0.00	N
ATOM 1326 H SER 87	51.587 61.870 47.852 0.00 0.00	H
ATOM 1327 CA SER 87	52.250 60.412 46.454 0.00 0.00	C
ATOM 1328 HA SER 87	51.846 59.408 46.320 0.00 0.00	H
ATOM 1329 CB SER 87	51.603 61.297 45.389 0.00 0.00	C
ATOM 1330 HB2 SER 87	51.890 60.923 44.406 0.00 0.00	H
ATOM 1331 HB3 SER 87	50.520 61.214 45.483 0.00 0.00	H
ATOM 1332 OG SER 87	51.995 62.653 45.512 0.00 0.00	O
ATOM 1333 HG SER 87	51.622 63.034 46.310 0.00 0.00	H
ATOM 1334 C SER 87	53.755 60.268 46.218 0.00 0.00	C
ATOM 1335 O SER 87	54.154 59.306 45.566 0.00 0.00	O
ATOM 1336 N GLN 88	54.598 61.144 46.761 0.00 0.00	N
ATOM 1337 H GLN 88	54.221 61.905 47.308 0.00 0.00	H
ATOM 1338 CA GLN 88	56.048 60.992 46.673 0.00 0.00	C
ATOM 1339 HA GLN 88	56.318 60.674 45.666 0.00 0.00	H
ATOM 1340 CB GLN 88	56.727 62.336 46.938 0.00 0.00	C
ATOM 1341 HB2 GLN 88	56.331 62.788 47.847 0.00 0.00	H
ATOM 1342 HB3 GLN 88	57.787 62.139 47.099 0.00 0.00	H
ATOM 1343 CG GLN 88	56.607 63.331 45.775 0.00 0.00	C
ATOM 1344 HG2 GLN 88	56.627 62.790 44.829 0.00 0.00	H
ATOM 1345 HG3 GLN 88	55.663 63.873 45.838 0.00 0.00	H
ATOM 1346 CD GLN 88	57.782 64.308 45.789 0.00 0.00	C
ATOM 1347 OE1 GLN 88	58.831 64.027 45.225 0.00 0.00	O
ATOM 1348 NE2 GLN 88	57.712 65.420 46.482 0.00 0.00	N
ATOM 1349 1HE2 GLN 88	58.527 66.015 46.518 0.00 0.00	H
ATOM 1350 2HE2 GLN 88	56.854 65.675 46.950 0.00 0.00	H
ATOM 1351 C GLN 88	56.580 59.900 47.618 0.00 0.00	C
ATOM 1352 O GLN 88	57.553 59.227 47.272 0.00 0.00	O
ATOM 1353 N LYS 89	55.943 59.664 48.774 0.00 0.00	N
ATOM 1354 H LYS 89	55.181 60.262 49.061 0.00 0.00	H
ATOM 1355 CA LYS 89	56.299 58.523 49.634 0.00 0.00	C
ATOM 1356 HA LYS 89	57.382 58.462 49.738 0.00 0.00	H
ATOM 1357 CB LYS 89	55.706 58.724 51.037 0.00 0.00	C
ATOM 1358 HB2 LYS 89	54.623 58.823 50.962 0.00 0.00	H
ATOM 1359 HB3 LYS 89	55.929 57.849 51.647 0.00 0.00	H
ATOM 1360 CG LYS 89	56.301 59.964 51.712 0.00 0.00	C
ATOM 1361 HG2 LYS 89	57.389 59.895 51.698 0.00 0.00	H
ATOM 1362 HG3 LYS 89	56.014 60.858 51.157 0.00 0.00	H
ATOM 1363 CD LYS 89	55.833 60.098 53.160 0.00 0.00	C
ATOM 1364 HD2 LYS 89	54.754 59.954 53.206 0.00 0.00	H
ATOM 1365 HD3 LYS 89	56.300 59.319 53.763 0.00 0.00	H
ATOM 1366 CE LYS 89	56.160 61.480 53.757 0.00 0.00	C
ATOM 1367 HE2 LYS 89	55.555 62.239 53.262 0.00 0.00	H
ATOM 1368 HE3 LYS 89	55.895 61.471 54.814 0.00 0.00	H
ATOM 1369 NZ LYS 89	57.584 61.836 53.593 0.00 0.00	N
ATOM 1370 HZ1 LYS 89	58.174 61.072 53.892 0.00 0.00	H
ATOM 1371 HZ2 LYS 89	57.813 62.042 52.631 0.00 0.00	H
ATOM 1372 HZ3 LYS 89	57.824 62.637 54.159 0.00 0.00	H
ATOM 1373 C LYS 89	55.856 57.196 49.007 0.00 0.00	C
ATOM 1374 O LYS 89	56.634 56.241 48.997 0.00 0.00	O
ATOM 1375 N ALA 90	54.661 57.146 48.400 0.00 0.00	N
ATOM 1376 H ALA 90	54.057 57.951 48.478 0.00 0.00	H
ATOM 1377 CA ALA 90	54.201 55.987 47.627 0.00 0.00	C
ATOM 1378 HA ALA 90	54.224 55.104 48.266 0.00 0.00	H
ATOM 1379 CB ALA 90	52.763 56.240 47.173 0.00 0.00	C
ATOM 1380 HB1 ALA 90	52.119 56.381 48.041 0.00 0.00	H
ATOM 1381 HB2 ALA 90	52.710 57.121 46.534 0.00 0.00	H
ATOM 1382 HB3 ALA 90	52.394 55.378 46.618 0.00 0.00	H
ATOM 1383 C ALA 90	55.135 55.713 46.433 0.00 0.00	C
ATOM 1384 O ALA 90	55.547 54.574 46.234 0.00 0.00	O
ATOM 1385 N TYR 91	55.543 56.744 45.688 0.00 0.00	N
ATOM 1386 H TYR 91	55.143 57.654 45.867 0.00 0.00	H
ATOM 1387 CA TYR 91	56.526 56.636 44.603 0.00 0.00	C
ATOM 1388 HA TYR 91	56.118 55.997 43.820 0.00 0.00	H
ATOM 1389 CB TYR 91	56.732 58.047 44.049 0.00 0.00	C
ATOM 1390 HB2 TYR 91	55.768 58.417 43.700 0.00 0.00	H
ATOM 1391 HB3 TYR 91	57.035 58.708 44.860 0.00 0.00	H
ATOM 1392 CG TYR 91	57.735 58.204 42.929 0.00 0.00	C
ATOM 1393 CD1 TYR 91	57.305 58.183 41.592 0.00 0.00	C
ATOM 1394 HD1 TYR 91	56.276 57.948 41.363 0.00 0.00	H
ATOM 1395 CE1 TYR 91	58.205 58.498 40.564 0.00 0.00	C
ATOM 1396 HE1 TYR 91	57.861 58.524 39.541 0.00 0.00	H
ATOM 1397 CZ TYR 91	59.540 58.845 40.867 0.00 0.00	C
ATOM 1398 OH TYR 91	60.387 59.199 39.869 0.00 0.00	O
ATOM 1399 HH TYR 91	59.930 59.230 39.025 0.00 0.00	H
ATOM 1400 CE2 TYR 91	59.987 58.803 42.208 0.00 0.00	C
ATOM 1401 HE2 TYR 91	61.012 59.049 42.441 0.00 0.00	H
ATOM 1402 CD2 TYR 91	59.078 58.491 43.234 0.00 0.00	C
ATOM 1403 HD2 TYR 91	59.410 58.496 44.261 0.00 0.00	H
ATOM 1404 C TYR 91	57.863 56.001 45.049 0.00 0.00	C
ATOM 1405 O TYR 91	58.351 55.076 44.397 0.00 0.00	O
ATOM 1406 N ASN 92	58.412 56.423 46.198 0.00 0.00	N
ATOM 1407 H ASN 92	57.990 57.204 46.679 0.00 0.00	H
ATOM 1408 CA ASN 92	59.575 55.748 46.779 0.00 0.00	C
ATOM 1409 HA ASN 92	60.358 55.708 46.021 0.00 0.00	H
ATOM 1410 CB ASN 92	60.116 56.533 47.987 0.00 0.00	C
ATOM 1411 HB2 ASN 92	60.454 57.515 47.658 0.00 0.00	H
ATOM 1412 HB3 ASN 92	59.321 56.661 48.721 0.00 0.00	H
ATOM 1413 CG ASN 92	61.287 55.783 48.624 0.00 0.00	C
ATOM 1414 OD1 ASN 92	61.160 55.249 49.723 0.00 0.00	O
ATOM 1415 ND2 ASN 92	62.405 55.648 47.927 0.00 0.00	N
ATOM 1416 1HD2 ASN 92	63.150 55.075 48.298 0.00 0.00	H
ATOM 1417 2HD2 ASN 92	62.481 56.055 47.006 0.00 0.00	H
ATOM 1418 C ASN 92	59.232 54.300 47.172 0.00 0.00	C
ATOM 1419 O ASN 92	59.983 53.392 46.827 0.00 0.00	O
ATOM 1420 N ARG 93	58.098 54.049 47.834 0.00 0.00	N
ATOM 1421 H ARG 93	57.496 54.821 48.084 0.00 0.00	H
ATOM 1422 CA ARG 93	57.719 52.695 48.253 0.00 0.00	C
ATOM 1423 HA ARG 93	58.559 52.311 48.832 0.00 0.00	H
ATOM 1424 CB ARG 93	56.504 52.755 49.198 0.00 0.00	C
ATOM 1425 HB2 ARG 93	56.677 53.543 49.931 0.00 0.00	H
ATOM 1426 HB3 ARG 93	55.599 52.986 48.636 0.00 0.00	H
ATOM 1427 CG ARG 93	56.323 51.430 49.950 0.00 0.00	C
ATOM 1428 HG2 ARG 93	56.057 50.648 49.238 0.00 0.00	H
ATOM 1429 HG3 ARG 93	57.257 51.151 50.437 0.00 0.00	H
ATOM 1430 CD ARG 93	55.226 51.528 51.006 0.00 0.00	C
ATOM 1431 HD2 ARG 93	55.475 52.311 51.723 0.00 0.00	H
ATOM 1432 HD3 ARG 93	54.289 51.793 50.515 0.00 0.00	H
ATOM 1433 NE ARG 93	55.075 50.244 51.713 0.00 0.00	N
ATOM 1434 HE ARG 93	55.619 49.468 51.364 0.00 0.00	H
ATOM 1435 CZ ARG 93	54.370 50.005 52.801 0.00 0.00	C
ATOM 1436 NH1 ARG 93	53.652 50.919 53.395 0.00 0.00	N
ATOM 1437 1HH1 ARG 93	53.630 51.862 53.036 0.00 0.00	H
ATOM 1438 2HH1 ARG 93	53.161 50.717 54.254 0.00 0.00	H
ATOM 1439 NH2 ARG 93	54.388 48.799 53.312 0.00 0.00	N
ATOM 1440 1HH2 ARG 93	54.990 48.109 52.885 0.00 0.00	H
ATOM 1441 2HH2 ARG 93	53.885 48.577 54.159 0.00 0.00	H
ATOM 1442 C ARG 93	57.511 51.723 47.071 0.00 0.00	C
ATOM 1443 O ARG 93	57.889 50.558 47.194 0.00 0.00	O
ATOM 1444 N ALA 94	57.023 52.193 45.921 0.00 0.00	N
ATOM 1445 H ALA 94	56.677 53.142 45.924 0.00 0.00	H
ATOM 1446 CA ALA 94	56.841 51.400 44.694 0.00 0.00	C
ATOM 1447 HA ALA 94	56.066 50.656 44.877 0.00 0.00	H
ATOM 1448 CB ALA 94	56.342 52.332 43.588 0.00 0.00	C
ATOM 1449 HB1 ALA 94	57.088 53.094 43.361 0.00 0.00	H
ATOM 1450 HB2 ALA 94	56.155 51.766 42.676 0.00 0.00	H
ATOM 1451 HB3 ALA 94	55.424 52.824 43.907 0.00 0.00	H
ATOM 1452 C ALA 94	58.114 50.661 44.239 0.00 0.00	C
ATOM 1453 O ALA 94	58.039 49.499 43.840 0.00 0.00	O
ATOM 1454 N LEU 95	59.283 51.293 44.387 0.00 0.00	N
ATOM 1455 H LEU 95	59.259 52.249 44.713 0.00 0.00	H
ATOM 1456 CA LEU 95	60.600 50.713 44.112 0.00 0.00	C
ATOM 1457 HA LEU 95	60.617 50.376 43.076 0.00 0.00	H
ATOM 1458 CB LEU 95	61.618 51.853 44.302 0.00 0.00	C
ATOM 1459 HB2 LEU 95	61.364 52.693 43.655 0.00 0.00	H
ATOM 1460 HB3 LEU 95	61.522 52.196 45.332 0.00 0.00	H
ATOM 1461 CG LEU 95	63.098 51.503 44.090 0.00 0.00	C
ATOM 1462 HG LEU 95	63.359 50.651 44.718 0.00 0.00	H
ATOM 1463 CD1 LEU 95	63.410 51.167 42.628 0.00 0.00	C
ATOM 1464 1HD1 LEU 95	63.153 52.003 41.978 0.00 0.00	H
ATOM 1465 2HD1 LEU 95	64.473 50.952 42.517 0.00 0.00	H
ATOM 1466 3HD1 LEU 95	62.858 50.279 42.320 0.00 0.00	H
ATOM 1467 CD2 LEU 95	63.952 52.692 44.549 0.00 0.00	C
ATOM 1468 1HD2 LEU 95	63.748 53.557 43.917 0.00 0.00	H
ATOM 1469 2HD2 LEU 95	63.722 52.933 45.587 0.00 0.00	H
ATOM 1470 3HD2 LEU 95	65.009 52.431 44.494 0.00 0.00	H
ATOM 1471 C LEU 95	60.922 49.489 45.002 0.00 0.00	C
ATOM 1472 O LEU 95	61.600 48.558 44.550 0.00 0.00	O
ATOM 1473 N GLU 96	60.419 49.456 46.238 0.00 0.00	N
ATOM 1474 H GLU 96	59.870 50.246 46.546 0.00 0.00	H
ATOM 1475 CA GLU 96	60.537 48.314 47.162 0.00 0.00	C
ATOM 1476 HA GLU 96	61.490 47.814 46.988 0.00 0.00	H
ATOM 1477 CB GLU 96	60.558 48.872 48.593 0.00 0.00	C
ATOM 1478 HB2 GLU 96	61.370 49.597 48.651 0.00 0.00	H
ATOM 1479 HB3 GLU 96	59.626 49.402 48.787 0.00 0.00	H
ATOM 1480 CG GLU 96	60.783 47.825 49.691 0.00 0.00	C
ATOM 1481 HG2 GLU 96	59.884 47.225 49.826 0.00 0.00	H
ATOM 1482 HG3 GLU 96	61.611 47.179 49.398 0.00 0.00	H
ATOM 1483 CD GLU 96	61.134 48.503 51.013 0.00 0.00	C
ATOM 1484 OE1 GLU 96	60.440 49.461 51.417 0.00 0.00	O
ATOM 1485 OE2 GLU 96	62.140 48.120 51.654 0.00 0.00	O
ATOM 1486 C GLU 96	59.409 47.287 46.966 0.00 0.00	C
ATOM 1487 O GLU 96	59.592 46.111 47.286 0.00 0.00	O
ATOM 1488 N LEU 97	58.275 47.703 46.384 0.00 0.00	N
ATOM 1489 H LEU 97	58.192 48.693 46.203 0.00 0.00	H
ATOM 1490 CA LEU 97	57.141 46.860 45.987 0.00 0.00	C
ATOM 1491 HA LEU 97	57.119 45.988 46.641 0.00 0.00	H
ATOM 1492 CB LEU 97	55.836 47.666 46.167 0.00 0.00	C
ATOM 1493 HB2 LEU 97	55.904 48.556 45.540 0.00 0.00	H
ATOM 1494 HB3 LEU 97	54.994 47.082 45.795 0.00 0.00	H
ATOM 1495 CG LEU 97	55.521 48.108 47.612 0.00 0.00	C
ATOM 1496 HG LEU 97	56.371 48.652 48.023 0.00 0.00	H
ATOM 1497 CD1 LEU 97	54.317 49.059 47.605 0.00 0.00	C
ATOM 1498 1HD1 LEU 97	54.526 49.920 46.970 0.00 0.00	H
ATOM 1499 2HD1 LEU 97	53.432 48.546 47.227 0.00 0.00	H
ATOM 1500 3HD1 LEU 97	54.111 49.410 48.616 0.00 0.00	H
ATOM 1501 CD2 LEU 97	55.232 46.917 48.533 0.00 0.00	C
ATOM 1502 1HD2 LEU 97	54.901 47.278 49.507 0.00 0.00	H
ATOM 1503 2HD2 LEU 97	54.453 46.280 48.114 0.00 0.00	H
ATOM 1504 3HD2 LEU 97	56.143 46.335 48.678 0.00 0.00	H
ATOM 1505 C LEU 97	57.265 46.297 44.554 0.00 0.00	C
ATOM 1506 O LEU 97	56.332 45.650 44.075 0.00 0.00	O
ATOM 1507 N GLY 98	58.393 46.522 43.870 0.00 0.00	N
ATOM 1508 H GLY 98	59.086 47.109 44.313 0.00 0.00	H
ATOM 1509 CA GLY 98	58.732 45.884 42.590 0.00 0.00	C
ATOM 1510 HA2 GLY 98	59.815 45.889 42.466 0.00 0.00	H
ATOM 1511 HA3 GLY 98	58.395 44.847 42.604 0.00 0.00	H
ATOM 1512 C GLY 98	58.147 46.556 41.346 0.00 0.00	C
ATOM 1513 O GLY 98	58.112 45.936 40.288 0.00 0.00	O
ATOM 1514 N ALA 99	57.687 47.806 41.442 0.00 0.00	N
ATOM 1515 H ALA 99	57.780 48.279 42.329 0.00 0.00	H
ATOM 1516 CA ALA 99	57.210 48.610 40.310 0.00 0.00	C
ATOM 1517 HA ALA 99	57.094 47.982 39.426 0.00 0.00	H
ATOM 1518 CB ALA 99	55.831 49.172 40.657 0.00 0.00	C
ATOM 1519 HB1 ALA 99	55.919 49.819 41.529 0.00 0.00	H
ATOM 1520 HB2 ALA 99	55.441 49.755 39.823 0.00 0.00	H
ATOM 1521 HB3 ALA 99	55.156 48.346 40.883 0.00 0.00	H
ATOM 1522 C ALA 99	58.212 49.720 39.954 0.00 0.00	C
ATOM 1523 O ALA 99	59.003 50.138 40.802 0.00 0.00	O
ATOM 1524 N GLN 100	58.185 50.216 38.719 0.00 0.00	N
ATOM 1525 H GLN 100	57.493 49.866 38.072 0.00 0.00	H
ATOM 1526 CA GLN 100	59.132 51.217 38.243 0.00 0.00	C
ATOM 1527 HA GLN 100	60.105 51.018 38.691 0.00 0.00	H
ATOM 1528 CB GLN 100	59.304 51.090 36.714 0.00 0.00	C
ATOM 1529 HB2 GLN 100	59.661 50.087 36.479 0.00 0.00	H
ATOM 1530 HB3 GLN 100	58.340 51.213 36.220 0.00 0.00	H
ATOM 1531 CG GLN 100	60.304 52.108 36.118 0.00 0.00	C
ATOM 1532 HG2 GLN 100	60.381 51.952 35.042 0.00 0.00	H
ATOM 1533 HG3 GLN 100	59.909 53.114 36.260 0.00 0.00	H
ATOM 1534 CD GLN 100	61.714 52.010 36.703 0.00 0.00	C
ATOM 1535 OE1 GLN 100	62.374 50.977 36.644 0.00 0.00	O
ATOM 1536 NE2 GLN 100	62.220 53.048 37.328 0.00 0.00	N
ATOM 1537 1HE2 GLN 100	63.113 52.934 37.785 0.00 0.00	H
ATOM 1538 2HE2 GLN 100	61.720 53.924 37.379 0.00 0.00	H
ATOM 1539 C GLN 100	58.650 52.631 38.611 0.00 0.00	C
ATOM 1540 O GLN 100	57.629 53.051 38.046 0.00 0.00	O
ATOM 1541 N PRO 101	59.367 53.397 39.465 0.00 0.00	N
ATOM 1542 CD PRO 101	60.469 52.971 40.321 0.00 0.00	C
ATOM 1543 HD2 PRO 101	61.213 52.390 39.776 0.00 0.00	H
ATOM 1544 HD3 PRO 101	60.080 52.402 41.166 0.00 0.00	H
ATOM 1545 CG PRO 101	61.118 54.246 40.856 0.00 0.00	C
ATOM 1546 HG2 PRO 101	61.905 54.576 40.178 0.00 0.00	H
ATOM 1547 HG3 PRO 101	61.515 54.114 41.862 0.00 0.00	H
ATOM 1548 CB PRO 101	59.964 55.249 40.833 0.00 0.00	C
ATOM 1549 HB2 PRO 101	60.334 56.269 40.727 0.00 0.00	H
ATOM 1550 HB3 PRO 101	59.368 55.136 41.739 0.00 0.00	H
ATOM 1551 CA PRO 101	59.127 54.832 39.618 0.00 0.00	C
ATOM 1552 HA PRO 101	58.073 55.035 39.808 0.00 0.00	H
ATOM 1553 C PRO 101	59.544 55.547 38.333 0.00 0.00	C
ATOM 1554 O PRO 101	60.669 55.380 37.868 0.00 0.00	O
ATOM 1555 N ILE 102	58.647 56.345 37.749 0.00 0.00	N
ATOM 1556 H ILE 102	57.745 56.464 38.189 0.00 0.00	H
ATOM 1557 CA ILE 102	58.935 57.100 36.523 0.00 0.00	C
ATOM 1558 HA ILE 102	59.577 56.506 35.872 0.00 0.00	H
ATOM 1559 CB ILE 102	57.647 57.402 35.728 0.00 0.00	C
ATOM 1560 HB ILE 102	56.941 57.895 36.397 0.00 0.00	H
ATOM 1561 CG2 ILE 102	57.917 58.355 34.539 0.00 0.00	C
ATOM 1562 1HG2 ILE 102	58.332 59.305 34.876 0.00 0.00	H
ATOM 1563 2HG2 ILE 102	58.616 57.899 33.839 0.00 0.00	H
ATOM 1564 3HG2 ILE 102	56.990 58.593 34.017 0.00 0.00	H
ATOM 1565 CG1 ILE 102	57.033 56.072 35.218 0.00 0.00	C
ATOM 1566 2HG1 ILE 102	57.665 55.661 34.431 0.00 0.00	H
ATOM 1567 3HG1 ILE 102	57.007 55.335 36.020 0.00 0.00	H
ATOM 1568 CD1 ILE 102	55.601 56.219 34.696 0.00 0.00	C
ATOM 1569 1HD1 ILE 102	54.969 56.621 35.488 0.00 0.00	H
ATOM 1570 2HD1 ILE 102	55.573 56.879 33.829 0.00 0.00	H
ATOM 1571 3HD1 ILE 102	55.220 55.242 34.399 0.00 0.00	H
ATOM 1572 C ILE 102	59.705 58.365 36.893 0.00 0.00	C
ATOM 1573 O ILE 102	59.138 59.330 37.415 0.00 0.00	O
ATOM 1574 N HIP 103	61.012 58.358 36.664 0.00 0.00	N
ATOM 1575 H HIP 103	61.433 57.541 36.244 0.00 0.00	H
ATOM 1576 CA HIP 103	61.815 59.557 36.759 0.00 0.00	C
ATOM 1577 HA HIP 103	61.417 60.153 37.580 0.00 0.00	H
ATOM 1578 CB HIP 103	63.256 59.198 37.143 0.00 0.00	C
ATOM 1579 HB2 HIP 103	63.639 58.415 36.489 0.00 0.00	H
ATOM 1580 HB3 HIP 103	63.878 60.082 37.002 0.00 0.00	H
ATOM 1581 CG HIP 103	63.361 58.776 38.579 0.00 0.00	C
ATOM 1582 ND1 HIP 103	63.663 59.597 39.650 0.00 0.00	N
ATOM 1583 HD1 HIP 103	63.969 60.557 39.593 0.00 0.00	H
ATOM 1584 CE1 HIP 103	63.561 58.873 40.776 0.00 0.00	C
ATOM 1585 HE1 HIP 103	63.780 59.233 41.771 0.00 0.00	H
ATOM 1586 NE2 HIP 103	63.190 57.617 40.450 0.00 0.00	N
ATOM 1587 HE2 HIP 103	63.063 56.860 41.107 0.00 0.00	H
ATOM 1588 CD2 HIP 103	63.068 57.535 39.076 0.00 0.00	C
ATOM 1589 HD2 HIP 103	62.782 56.669 38.497 0.00 0.00	H
ATOM 1590 C HIP 103	61.705 60.387 35.465 0.00 0.00	C
ATOM 1591 O HIP 103	61.683 59.838 34.358 0.00 0.00	O
ATOM 1592 N ILE 104	61.623 61.713 35.597 0.00 0.00	N
ATOM 1593 H ILE 104	61.665 62.097 36.530 0.00 0.00	H
ATOM 1594 CA ILE 104	61.461 62.661 34.489 0.00 0.00	C
ATOM 1595 HA ILE 104	62.170 62.386 33.708 0.00 0.00	H
ATOM 1596 CB ILE 104	60.034 62.579 33.877 0.00 0.00	C
ATOM 1597 HB ILE 104	59.913 61.576 33.468 0.00 0.00	H
ATOM 1598 CG2 ILE 104	58.903 62.807 34.898 0.00 0.00	C
ATOM 1599 1HG2 ILE 104	59.045 62.163 35.765 0.00 0.00	H
ATOM 1600 2HG2 ILE 104	58.889 63.849 35.219 0.00 0.00	H
ATOM 1601 3HG2 ILE 104	57.943 62.563 34.443 0.00 0.00	H
ATOM 1602 CG1 ILE 104	59.911 63.578 32.710 0.00 0.00	C
ATOM 1603 2HG1 ILE 104	59.911 64.600 33.090 0.00 0.00	H
ATOM 1604 3HG1 ILE 104	60.766 63.465 32.043 0.00 0.00	H
ATOM 1605 CD1 ILE 104	58.647 63.381 31.872 0.00 0.00	C
ATOM 1606 1HD1 ILE 104	58.667 64.065 31.024 0.00 0.00	H
ATOM 1607 2HD1 ILE 104	58.598 62.355 31.508 0.00 0.00	H
ATOM 1608 3HD1 ILE 104	57.760 63.601 32.466 0.00 0.00	H
ATOM 1609 C ILE 104	61.852 64.065 34.951 0.00 0.00	C
ATOM 1610 O ILE 104	61.478 64.504 36.041 0.00 0.00	O
ATOM 1611 N ASP 105	62.617 64.771 34.135 0.00 0.00	N
ATOM 1612 H ASP 105	62.925 64.342 33.274 0.00 0.00	H
ATOM 1613 CA ASP 105	62.937 66.175 34.353 0.00 0.00	C
ATOM 1614 HA ASP 105	63.084 66.339 35.421 0.00 0.00	H
ATOM 1615 CB ASP 105	64.246 66.552 33.648 0.00 0.00	C
ATOM 1616 HB2 ASP 105	65.043 65.913 34.030 0.00 0.00	H
ATOM 1617 HB3 ASP 105	64.135 66.373 32.579 0.00 0.00	H
ATOM 1618 CG ASP 105	64.630 68.016 33.884 0.00 0.00	C
ATOM 1619 OD1 ASP 105	64.350 68.555 34.979 0.00 0.00	O
ATOM 1620 OD2 ASP 105	65.238 68.622 32.974 0.00 0.00	O
ATOM 1621 C ASP 105	61.790 67.079 33.882 0.00 0.00	C
ATOM 1622 O ASP 105	61.327 66.983 32.742 0.00 0.00	O
ATOM 1623 N THR 106	61.372 67.993 34.759 0.00 0.00	N
ATOM 1624 H THR 106	61.772 67.965 35.686 0.00 0.00	H
ATOM 1625 CA THR 106	60.346 69.020 34.519 0.00 0.00	C
ATOM 1626 HA THR 106	59.750 68.743 33.649 0.00 0.00	H
ATOM 1627 CB THR 106	59.421 69.061 35.738 0.00 0.00	C
ATOM 1628 HB THR 106	58.717 69.886 35.633 0.00 0.00	H
ATOM 1629 CG2 THR 106	58.641 67.752 35.869 0.00 0.00	C
ATOM 1630 1HG2 THR 106	58.110 67.547 34.940 0.00 0.00	H
ATOM 1631 2HG2 THR 106	59.313 66.921 36.086 0.00 0.00	H
ATOM 1632 3HG2 THR 106	57.919 67.833 36.681 0.00 0.00	H
ATOM 1633 OG1 THR 106	60.211 69.241 36.888 0.00 0.00	O
ATOM 1634 HG1 THR 106	59.632 69.158 37.649 0.00 0.00	H
ATOM 1635 C THR 106	60.944 70.395 34.214 0.00 0.00	C
ATOM 1636 O THR 106	60.201 71.310 33.853 0.00 0.00	O
ATOM 1637 N GLY 107	62.267 70.541 34.318 0.00 0.00	N
ATOM 1638 H GLY 107	62.797 69.731 34.604 0.00 0.00	H
ATOM 1639 CA GLY 107	63.037 71.783 34.135 0.00 0.00	C
ATOM 1640 HA2 GLY 107	63.827 71.575 33.413 0.00 0.00	H
ATOM 1641 HA3 GLY 107	62.401 72.579 33.748 0.00 0.00	H
ATOM 1642 C GLY 107	63.737 72.259 35.423 0.00 0.00	C
ATOM 1643 O GLY 107	63.510 71.676 36.486 0.00 0.00	O
ATOM 1644 N PRO 108	64.582 73.310 35.342 0.00 0.00	N
ATOM 1645 CD PRO 108	64.891 74.054 34.126 0.00 0.00	C
ATOM 1646 HD2 PRO 108	64.145 74.836 33.985 0.00 0.00	H
ATOM 1647 HD3 PRO 108	64.907 73.408 33.248 0.00 0.00	H
ATOM 1648 CG PRO 108	66.272 74.661 34.352 0.00 0.00	C
ATOM 1649 HG2 PRO 108	66.423 75.582 33.789 0.00 0.00	H
ATOM 1650 HG3 PRO 108	67.029 73.920 34.096 0.00 0.00	H
ATOM 1651 CB PRO 108	66.274 74.915 35.853 0.00 0.00	C
ATOM 1652 HB2 PRO 108	65.762 75.855 36.056 0.00 0.00	H
ATOM 1653 HB3 PRO 108	67.287 74.941 36.255 0.00 0.00	H
ATOM 1654 CA PRO 108	65.468 73.738 36.421 0.00 0.00	C
ATOM 1655 HA PRO 108	66.145 72.914 36.643 0.00 0.00	H
ATOM 1656 C PRO 108	64.796 74.170 37.732 0.00 0.00	C
ATOM 1657 O PRO 108	65.477 74.136 38.753 0.00 0.00	O
ATOM 1658 N MET 109	63.519 74.572 37.741 0.00 0.00	N
ATOM 1659 H MET 109	63.022 74.606 36.863 0.00 0.00	H
ATOM 1660 CA MET 109	62.822 75.050 38.953 0.00 0.00	C
ATOM 1661 HA MET 109	63.423 74.812 39.831 0.00 0.00	H
ATOM 1662 CB MET 109	62.658 76.570 38.884 0.00 0.00	C
ATOM 1663 HB2 MET 109	62.021 76.841 38.042 0.00 0.00	H
ATOM 1664 HB3 MET 109	62.183 76.916 39.802 0.00 0.00	H
ATOM 1665 CG MET 109	64.013 77.278 38.738 0.00 0.00	C
ATOM 1666 HG2 MET 109	64.710 76.856 39.463 0.00 0.00	H
ATOM 1667 HG3 MET 109	64.405 77.075 37.742 0.00 0.00	H
ATOM 1668 SD MET 109	63.951 79.066 38.962 0.00 0.00	S
ATOM 1669 CE MET 109	65.660 79.453 38.515 0.00 0.00	C
ATOM 1670 HE1 MET 109	65.848 79.176 37.478 0.00 0.00	H
ATOM 1671 HE2 MET 109	65.820 80.524 38.637 0.00 0.00	H
ATOM 1672 HE3 MET 109	66.343 78.908 39.167 0.00 0.00	H
ATOM 1673 C MET 109	61.457 74.390 39.229 0.00 0.00	C
ATOM 1674 O MET 109	60.964 74.481 40.357 0.00 0.00	O
ATOM 1675 N GLU 110	60.855 73.712 38.253 0.00 0.00	N
ATOM 1676 H GLU 110	61.317 73.685 37.355 0.00 0.00	H
ATOM 1677 CA GLU 110	59.629 72.917 38.424 0.00 0.00	C
ATOM 1678 HA GLU 110	58.836 73.558 38.809 0.00 0.00	H
ATOM 1679 CB GLU 110	59.188 72.336 37.066 0.00 0.00	C
ATOM 1680 HB2 GLU 110	60.082 71.984 36.552 0.00 0.00	H
ATOM 1681 HB3 GLU 110	58.537 71.476 37.225 0.00 0.00	H
ATOM 1682 CG GLU 110	58.465 73.330 36.146 0.00 0.00	C
ATOM 1683 HG2 GLU 110	59.005 74.277 36.149 0.00 0.00	H
ATOM 1684 HG3 GLU 110	58.479 72.940 35.128 0.00 0.00	H
ATOM 1685 CD GLU 110	57.015 73.549 36.546 0.00 0.00	C
ATOM 1686 OE1 GLU 110	56.595 74.718 36.696 0.00 0.00	O
ATOM 1687 OE2 GLU 110	56.259 72.559 36.688 0.00 0.00	O
ATOM 1688 C GLU 110	59.806 71.765 39.431 0.00 0.00	C
ATOM 1689 O GLU 110	60.881 71.170 39.540 0.00 0.00	O
ATOM 1690 N LEU 111	58.728 71.416 40.139 0.00 0.00	N
ATOM 1691 H LEU 111	57.861 71.904 39.966 0.00 0.00	H
ATOM 1692 CA LEU 111	58.658 70.228 41.005 0.00 0.00	C
ATOM 1693 HA LEU 111	59.543 70.201 41.640 0.00 0.00	H
ATOM 1694 CB LEU 111	57.403 70.305 41.902 0.00 0.00	C
ATOM 1695 HB2 LEU 111	56.518 70.226 41.270 0.00 0.00	H
ATOM 1696 HB3 LEU 111	57.413 69.437 42.561 0.00 0.00	H
ATOM 1697 CG LEU 111	57.269 71.572 42.773 0.00 0.00	C
ATOM 1698 HG LEU 111	57.142 72.438 42.123 0.00 0.00	H
ATOM 1699 CD1 LEU 111	56.015 71.453 43.652 0.00 0.00	C
ATOM 1700 1HD1 LEU 111	55.144 71.250 43.030 0.00 0.00	H
ATOM 1701 2HD1 LEU 111	56.130 70.642 44.371 0.00 0.00	H
ATOM 1702 3HD1 LEU 111	55.861 72.383 44.200 0.00 0.00	H
ATOM 1703 CD2 LEU 111	58.495 71.802 43.655 0.00 0.00	C
ATOM 1704 1HD2 LEU 111	58.659 70.927 44.285 0.00 0.00	H
ATOM 1705 2HD2 LEU 111	59.381 71.992 43.050 0.00 0.00	H
ATOM 1706 3HD2 LEU 111	58.330 72.668 44.297 0.00 0.00	H
ATOM 1707 C LEU 111	58.661 68.936 40.170 0.00 0.00	C
ATOM 1708 O LEU 111	58.472 68.974 38.951 0.00 0.00	O
ATOM 1709 N ASN 112	58.831 67.788 40.821 0.00 0.00	N
ATOM 1710 H ASN 112	58.908 67.817 41.827 0.00 0.00	H
ATOM 1711 CA ASN 112	58.736 66.466 40.201 0.00 0.00	C
ATOM 1712 HA ASN 112	58.894 66.551 39.126 0.00 0.00	H
ATOM 1713 CB ASN 112	59.838 65.563 40.775 0.00 0.00	C
ATOM 1714 HB2 ASN 112	59.773 65.537 41.863 0.00 0.00	H
ATOM 1715 HB3 ASN 112	59.683 64.550 40.404 0.00 0.00	H
ATOM 1716 CG ASN 112	61.223 66.018 40.346 0.00 0.00	C
ATOM 1717 OD1 ASN 112	61.975 66.617 41.109 0.00 0.00	O
ATOM 1718 ND2 ASN 112	61.607 65.759 39.116 0.00 0.00	N
ATOM 1719 1HD2 ASN 112	62.523 66.063 38.819 0.00 0.00	H
ATOM 1720 2HD2 ASN 112	60.991 65.270 38.483 0.00 0.00	H
ATOM 1721 C ASN 112	57.349 65.846 40.438 0.00 0.00	C
ATOM 1722 O ASN 112	56.903 65.768 41.578 0.00 0.00	O
ATOM 1723 N LEU 113	56.698 65.349 39.379 0.00 0.00	N
ATOM 1724 H LEU 113	57.170 65.325 38.487 0.00 0.00	H
ATOM 1725 CA LEU 113	55.387 64.693 39.494 0.00 0.00	C
ATOM 1726 HA LEU 113	54.931 65.062 40.411 0.00 0.00	H
ATOM 1727 CB LEU 113	54.423 65.170 38.377 0.00 0.00	C
ATOM 1728 HB2 LEU 113	53.413 64.897 38.683 0.00 0.00	H
ATOM 1729 HB3 LEU 113	54.451 66.259 38.402 0.00 0.00	H
ATOM 1730 CG LEU 113	54.582 64.761 36.891 0.00 0.00	C
ATOM 1731 HG LEU 113	53.993 65.485 36.328 0.00 0.00	H
ATOM 1732 CD1 LEU 113	56.018 64.877 36.356 0.00 0.00	C
ATOM 1733 1HD1 LEU 113	56.405 65.876 36.556 0.00 0.00	H
ATOM 1734 2HD1 LEU 113	56.661 64.132 36.824 0.00 0.00	H
ATOM 1735 3HD1 LEU 113	56.021 64.715 35.278 0.00 0.00	H
ATOM 1736 CD2 LEU 113	53.984 63.382 36.577 0.00 0.00	C
ATOM 1737 1HD2 LEU 113	53.969 63.248 35.495 0.00 0.00	H
ATOM 1738 2HD2 LEU 113	54.578 62.585 37.023 0.00 0.00	H
ATOM 1739 3HD2 LEU 113	52.961 63.325 36.950 0.00 0.00	H
ATOM 1740 C LEU 113	55.557 63.164 39.643 0.00 0.00	C
ATOM 1741 O LEU 113	56.268 62.564 38.827 0.00 0.00	O
ATOM 1742 N PRO 114	55.014 62.521 40.697 0.00 0.00	N
ATOM 1743 CD PRO 114	54.400 63.145 41.855 0.00 0.00	C
ATOM 1744 HD2 PRO 114	53.498 63.695 41.587 0.00 0.00	H
ATOM 1745 HD3 PRO 114	55.114 63.819 42.327 0.00 0.00	H
ATOM 1746 CG PRO 114	54.049 62.019 42.820 0.00 0.00	C
ATOM 1747 HG2 PRO 114	53.025 61.701 42.623 0.00 0.00	H
ATOM 1748 HG3 PRO 114	54.166 62.320 43.861 0.00 0.00	H
ATOM 1749 CB PRO 114	54.997 60.892 42.435 0.00 0.00	C
ATOM 1750 HB2 PRO 114	54.557 59.920 42.660 0.00 0.00	H
ATOM 1751 HB3 PRO 114	55.944 61.024 42.959 0.00 0.00	H
ATOM 1752 CA PRO 114	55.198 61.093 40.930 0.00 0.00	C
ATOM 1753 HA PRO 114	56.223 60.818 40.684 0.00 0.00	H
ATOM 1754 C PRO 114	54.229 60.249 40.077 0.00 0.00	C
ATOM 1755 O PRO 114	53.047 60.567 39.948 0.00 0.00	O
ATOM 1756 N ALA 115	54.740 59.140 39.530 0.00 0.00	N
ATOM 1757 H ALA 115	55.723 58.952 39.661 0.00 0.00	H
ATOM 1758 CA ALA 115	54.017 58.172 38.709 0.00 0.00	C
ATOM 1759 HA ALA 115	53.050 57.963 39.165 0.00 0.00	H
ATOM 1760 CB ALA 115	53.780 58.756 37.315 0.00 0.00	C
ATOM 1761 HB1 ALA 115	53.257 59.709 37.396 0.00 0.00	H
ATOM 1762 HB2 ALA 115	54.729 58.920 36.805 0.00 0.00	H
ATOM 1763 HB3 ALA 115	53.173 58.064 36.730 0.00 0.00	H
ATOM 1764 C ALA 115	54.795 56.851 38.629 0.00 0.00	C
ATOM 1765 O ALA 115	56.012 56.842 38.827 0.00 0.00	O
ATOM 1766 N ILE 116	54.125 55.745 38.312 0.00 0.00	N
ATOM 1767 H ILE 116	53.129 55.808 38.158 0.00 0.00	H
ATOM 1768 CA ILE 116	54.776 54.433 38.107 0.00 0.00	C
ATOM 1769 HA ILE 116	55.851 54.588 38.024 0.00 0.00	H
ATOM 1770 CB ILE 116	54.529 53.478 39.305 0.00 0.00	C
ATOM 1771 HB ILE 116	55.060 52.551 39.090 0.00 0.00	H
ATOM 1772 CG2 ILE 116	55.128 54.072 40.596 0.00 0.00	C
ATOM 1773 1HG2 ILE 116	56.188 54.277 40.447 0.00 0.00	H
ATOM 1774 2HG2 ILE 116	54.621 54.996 40.873 0.00 0.00	H
ATOM 1775 3HG2 ILE 116	55.039 53.353 41.411 0.00 0.00	H
ATOM 1776 CG1 ILE 116	53.034 53.135 39.474 0.00 0.00	C
ATOM 1777 2HG1 ILE 116	52.483 54.040 39.732 0.00 0.00	H
ATOM 1778 3HG1 ILE 116	52.641 52.750 38.533 0.00 0.00	H
ATOM 1779 CD1 ILE 116	52.747 52.069 40.530 0.00 0.00	C
ATOM 1780 1HD1 ILE 116	53.346 51.180 40.329 0.00 0.00	H
ATOM 1781 2HD1 ILE 116	52.979 52.434 41.531 0.00 0.00	H
ATOM 1782 3HD1 ILE 116	51.688 51.813 40.496 0.00 0.00	H
ATOM 1783 C ILE 116	54.331 53.793 36.786 0.00 0.00	C
ATOM 1784 O ILE 116	53.240 54.075 36.304 0.00 0.00	O
ATOM 1785 N LYS 117	55.130 52.916 36.177 0.00 0.00	N
ATOM 1786 H LYS 117	56.024 52.698 36.592 0.00 0.00	H
ATOM 1787 CA LYS 117	54.679 52.210 34.964 0.00 0.00	C
ATOM 1788 HA LYS 117	54.249 52.932 34.270 0.00 0.00	H
ATOM 1789 CB LYS 117	55.861 51.518 34.272 0.00 0.00	C
ATOM 1790 HB2 LYS 117	56.371 50.866 34.980 0.00 0.00	H
ATOM 1791 HB3 LYS 117	55.456 50.896 33.474 0.00 0.00	H
ATOM 1792 CG LYS 117	56.867 52.486 33.641 0.00 0.00	C
ATOM 1793 HG2 LYS 117	56.355 53.147 32.941 0.00 0.00	H
ATOM 1794 HG3 LYS 117	57.343 53.087 34.416 0.00 0.00	H
ATOM 1795 CD LYS 117	57.936 51.682 32.891 0.00 0.00	C
ATOM 1796 HD2 LYS 117	58.494 51.082 33.609 0.00 0.00	H
ATOM 1797 HD3 LYS 117	57.458 51.009 32.179 0.00 0.00	H
ATOM 1798 CE LYS 117	58.876 52.622 32.131 0.00 0.00	C
ATOM 1799 HE2 LYS 117	58.303 53.179 31.389 0.00 0.00	H
ATOM 1800 HE3 LYS 117	59.304 53.333 32.838 0.00 0.00	H
ATOM 1801 NZ LYS 117	59.970 51.872 31.472 0.00 0.00	N
ATOM 1802 HZ1 LYS 117	60.507 51.350 32.150 0.00 0.00	H
ATOM 1803 HZ2 LYS 117	59.612 51.212 30.797 0.00 0.00	H
ATOM 1804 HZ3 LYS 117	60.601 52.482 30.971 0.00 0.00	H
ATOM 1805 C LYS 117	53.563 51.193 35.298 0.00 0.00	C
ATOM 1806 O LYS 117	53.772 50.316 36.138 0.00 0.00	O
ATOM 1807 N GLY 118	52.407 51.296 34.629 0.00 0.00	N
ATOM 1808 H GLY 118	52.271 52.094 34.024 0.00 0.00	H
ATOM 1809 CA GLY 118	51.271 50.369 34.763 0.00 0.00	C
ATOM 1810 HA2 GLY 118	51.279 49.896 35.745 0.00 0.00	H
ATOM 1811 HA3 GLY 118	50.347 50.934 34.645 0.00 0.00	H
ATOM 1812 C GLY 118	51.265 49.266 33.710 0.00 0.00	C
ATOM 1813 O GLY 118	52.326 48.830 33.268 0.00 0.00	O
ATOM 1814 N ILE 119	50.082 48.788 33.316 0.00 0.00	N
ATOM 1815 H ILE 119	49.263 49.321 33.596 0.00 0.00	H
ATOM 1816 CA ILE 119	49.920 47.729 32.298 0.00 0.00	C
ATOM 1817 HA ILE 119	50.562 46.893 32.569 0.00 0.00	H
ATOM 1818 CB ILE 119	48.466 47.198 32.255 0.00 0.00	C
ATOM 1819 HB ILE 119	47.792 48.037 32.074 0.00 0.00	H
ATOM 1820 CG2 ILE 119	48.310 46.172 31.110 0.00 0.00	C
ATOM 1821 1HG2 ILE 119	48.485 46.645 30.144 0.00 0.00	H
ATOM 1822 2HG2 ILE 119	49.015 45.350 31.241 0.00 0.00	H
ATOM 1823 3HG2 ILE 119	47.301 45.767 31.085 0.00 0.00	H
ATOM 1824 CG1 ILE 119	48.115 46.549 33.616 0.00 0.00	C
ATOM 1825 2HG1 ILE 119	48.783 45.712 33.788 0.00 0.00	H
ATOM 1826 3HG1 ILE 119	48.280 47.272 34.414 0.00 0.00	H
ATOM 1827 CD1 ILE 119	46.679 46.037 33.760 0.00 0.00	C
ATOM 1828 1HD1 ILE 119	46.545 45.652 34.770 0.00 0.00	H
ATOM 1829 2HD1 ILE 119	45.970 46.846 33.600 0.00 0.00	H
ATOM 1830 3HD1 ILE 119	46.483 45.230 33.056 0.00 0.00	H
ATOM 1831 C ILE 119	50.400 48.246 30.937 0.00 0.00	C
ATOM 1832 O ILE 119	50.070 49.367 30.540 0.00 0.00	O
ATOM 1833 N GLY 120	51.244 47.468 30.249 0.00 0.00	N
ATOM 1834 H GLY 120	51.500 46.572 30.638 0.00 0.00	H
ATOM 1835 CA GLY 120	51.868 47.881 28.992 0.00 0.00	C
ATOM 1836 HA2 GLY 120	52.411 47.039 28.563 0.00 0.00	H
ATOM 1837 HA3 GLY 120	51.095 48.204 28.294 0.00 0.00	H
ATOM 1838 C GLY 120	52.835 49.053 29.139 0.00 0.00	C
ATOM 1839 O GLY 120	53.261 49.608 28.133 0.00 0.00	O
ATOM 1840 N GLY 121	53.147 49.481 30.367 0.00 0.00	N
ATOM 1841 H GLY 121	52.770 48.967 31.150 0.00 0.00	H
ATOM 1842 CA GLY 121	53.927 50.682 30.663 0.00 0.00	C
ATOM 1843 HA2 GLY 121	54.456 50.547 31.607 0.00 0.00	H
ATOM 1844 HA3 GLY 121	54.652 50.859 29.869 0.00 0.00	H
ATOM 1845 C GLY 121	53.094 51.957 30.790 0.00 0.00	C
ATOM 1846 O GLY 121	53.667 52.975 31.184 0.00 0.00	O
ATOM 1847 N ALA 122	51.782 51.944 30.506 0.00 0.00	N
ATOM 1848 H ALA 122	51.343 51.073 30.245 0.00 0.00	H
ATOM 1849 CA ALA 122	50.932 53.140 30.568 0.00 0.00	C
ATOM 1850 HA ALA 122	51.310 53.880 29.862 0.00 0.00	H
ATOM 1851 CB ALA 122	49.516 52.775 30.116 0.00 0.00	C
ATOM 1852 HB1 ALA 122	49.142 51.940 30.709 0.00 0.00	H
ATOM 1853 HB2 ALA 122	48.852 53.631 30.235 0.00 0.00	H
ATOM 1854 HB3 ALA 122	49.521 52.482 29.066 0.00 0.00	H
ATOM 1855 C ALA 122	50.942 53.698 32.010 0.00 0.00	C
ATOM 1856 O ALA 122	50.520 52.952 32.908 0.00 0.00	O
ATOM 1857 N PRO 123	51.450 54.926 32.256 0.00 0.00	N
ATOM 1858 CD PRO 123	52.099 55.806 31.284 0.00 0.00	C
ATOM 1859 HD2 PRO 123	51.341 56.423 30.801 0.00 0.00	H
ATOM 1860 HD3 PRO 123	52.684 55.254 30.549 0.00 0.00	H
ATOM 1861 CG PRO 123	53.038 56.702 32.087 0.00 0.00	C
ATOM 1862 HG2 PRO 123	53.179 57.671 31.607 0.00 0.00	H
ATOM 1863 HG3 PRO 123	53.991 56.196 32.238 0.00 0.00	H
ATOM 1864 CB PRO 123	52.284 56.828 33.402 0.00 0.00	C
ATOM 1865 HB2 PRO 123	51.477 57.550 33.274 0.00 0.00	H
ATOM 1866 HB3 PRO 123	52.939 57.123 34.221 0.00 0.00	H
ATOM 1867 CA PRO 123	51.697 55.435 33.597 0.00 0.00	C
ATOM 1868 HA PRO 123	52.459 54.805 34.055 0.00 0.00	H
ATOM 1869 C PRO 123	50.471 55.476 34.507 0.00 0.00	C
ATOM 1870 O PRO 123	49.384 55.889 34.096 0.00 0.00	O
ATOM 1871 N LEU 124	50.690 55.113 35.772 0.00 0.00	N
ATOM 1872 H LEU 124	51.620 54.800 36.012 0.00 0.00	H
ATOM 1873 CA LEU 124	49.769 55.290 36.886 0.00 0.00	C
ATOM 1874 HA LEU 124	48.765 55.498 36.516 0.00 0.00	H
ATOM 1875 CB LEU 124	49.698 54.005 37.736 0.00 0.00	C
ATOM 1876 HB2 LEU 124	50.660 53.871 38.231 0.00 0.00	H
ATOM 1877 HB3 LEU 124	48.940 54.142 38.507 0.00 0.00	H
ATOM 1878 CG LEU 124	49.386 52.723 36.945 0.00 0.00	C
ATOM 1879 HG LEU 124	50.129 52.604 36.157 0.00 0.00	H
ATOM 1880 CD1 LEU 124	49.496 51.489 37.855 0.00 0.00	C
ATOM 1881 1HD1 LEU 124	49.271 50.589 37.284 0.00 0.00	H
ATOM 1882 2HD1 LEU 124	50.513 51.403 38.239 0.00 0.00	H
ATOM 1883 3HD1 LEU 124	48.801 51.574 38.690 0.00 0.00	H
ATOM 1884 CD2 LEU 124	48.009 52.786 36.285 0.00 0.00	C
ATOM 1885 1HD2 LEU 124	47.764 51.821 35.840 0.00 0.00	H
ATOM 1886 2HD2 LEU 124	47.249 53.036 37.025 0.00 0.00	H
ATOM 1887 3HD2 LEU 124	48.013 53.539 35.497 0.00 0.00	H
ATOM 1888 C LEU 124	50.268 56.490 37.694 0.00 0.00	C
ATOM 1889 O LEU 124	51.269 56.400 38.409 0.00 0.00	O
ATOM 1890 N TYR 125	49.592 57.627 37.551 0.00 0.00	N
ATOM 1891 H TYR 125	48.780 57.623 36.950 0.00 0.00	H
ATOM 1892 CA TYR 125	49.942 58.860 38.250 0.00 0.00	C
ATOM 1893 HA TYR 125	51.026 58.973 38.227 0.00 0.00	H
ATOM 1894 CB TYR 125	49.338 60.070 37.523 0.00 0.00	C
ATOM 1895 HB2 TYR 125	48.264 59.923 37.411 0.00 0.00	H
ATOM 1896 HB3 TYR 125	49.496 60.962 38.128 0.00 0.00	H
ATOM 1897 CG TYR 125	49.972 60.263 36.165 0.00 0.00	C
ATOM 1898 CD1 TYR 125	49.376 59.723 35.016 0.00 0.00	C
ATOM 1899 HD1 TYR 125	48.401 59.262 35.078 0.00 0.00	H
ATOM 1900 CE1 TYR 125	50.065 59.726 33.794 0.00 0.00	C
ATOM 1901 HE1 TYR 125	49.603 59.281 32.925 0.00 0.00	H
ATOM 1902 CZ TYR 125	51.365 60.272 33.715 0.00 0.00	C
ATOM 1903 OH TYR 125	52.074 60.205 32.556 0.00 0.00	O
ATOM 1904 HH TYR 125	51.562 59.805 31.850 0.00 0.00	H
ATOM 1905 CE2 TYR 125	51.934 60.875 34.858 0.00 0.00	C
ATOM 1906 HE2 TYR 125	52.928 61.293 34.795 0.00 0.00	H
ATOM 1907 CD2 TYR 125	51.233 60.884 36.082 0.00 0.00	C
ATOM 1908 HD2 TYR 125	51.674 61.310 36.971 0.00 0.00	H
ATOM 1909 C TYR 125	49.499 58.790 39.714 0.00 0.00	C
ATOM 1910 O TYR 125	48.323 58.570 40.007 0.00 0.00	O
ATOM 1911 N LEU 126	50.438 59.012 40.626 0.00 0.00	N
ATOM 1912 H LEU 126	51.352 59.298 40.304 0.00 0.00	H
ATOM 1913 CA LEU 126	50.176 59.044 42.060 0.00 0.00	C
ATOM 1914 HA LEU 126	49.300 58.439 42.294 0.00 0.00	H
ATOM 1915 CB LEU 126	51.398 58.479 42.803 0.00 0.00	C
ATOM 1916 HB2 LEU 126	52.244 59.140 42.617 0.00 0.00	H
ATOM 1917 HB3 LEU 126	51.194 58.509 43.873 0.00 0.00	H
ATOM 1918 CG LEU 126	51.801 57.042 42.402 0.00 0.00	C
ATOM 1919 HG LEU 126	51.966 56.999 41.325 0.00 0.00	H
ATOM 1920 CD1 LEU 126	53.120 56.667 43.101 0.00 0.00	C
ATOM 1921 1HD1 LEU 126	53.418 55.657 42.818 0.00 0.00	H
ATOM 1922 2HD1 LEU 126	53.903 57.351 42.773 0.00 0.00	H
ATOM 1923 3HD1 LEU 126	53.011 56.718 44.185 0.00 0.00	H
ATOM 1924 CD2 LEU 126	50.705 56.020 42.749 0.00 0.00	C
ATOM 1925 1HD2 LEU 126	51.037 55.016 42.484 0.00 0.00	H
ATOM 1926 2HD2 LEU 126	50.488 56.061 43.816 0.00 0.00	H
ATOM 1927 3HD2 LEU 126	49.790 56.236 42.198 0.00 0.00	H
ATOM 1928 C LEU 126	49.875 60.496 42.436 0.00 0.00	C
ATOM 1929 O LEU 126	50.654 61.391 42.098 0.00 0.00	O
ATOM 1930 N ILE 127	48.782 60.746 43.155 0.00 0.00	N
ATOM 1931 H ILE 127	48.143 59.991 43.361 0.00 0.00	H
ATOM 1932 CA ILE 127	48.475 62.088 43.674 0.00 0.00	C
ATOM 1933 HA ILE 127	49.390 62.680 43.670 0.00 0.00	H
ATOM 1934 CB ILE 127	47.465 62.848 42.774 0.00 0.00	C
ATOM 1935 HB ILE 127	47.334 63.843 43.201 0.00 0.00	H
ATOM 1936 CG2 ILE 127	48.022 63.043 41.353 0.00 0.00	C
ATOM 1937 1HG2 ILE 127	49.014 63.492 41.404 0.00 0.00	H
ATOM 1938 2HG2 ILE 127	48.073 62.088 40.830 0.00 0.00	H
ATOM 1939 3HG2 ILE 127	47.385 63.716 40.778 0.00 0.00	H
ATOM 1940 CG1 ILE 127	46.074 62.184 42.775 0.00 0.00	C
ATOM 1941 2HG1 ILE 127	46.136 61.155 42.418 0.00 0.00	H
ATOM 1942 3HG1 ILE 127	45.701 62.158 43.799 0.00 0.00	H
ATOM 1943 CD1 ILE 127	45.045 62.950 41.940 0.00 0.00	C
ATOM 1944 1HD1 ILE 127	45.158 64.021 42.112 0.00 0.00	H
ATOM 1945 2HD1 ILE 127	45.195 62.741 40.880 0.00 0.00	H
ATOM 1946 3HD1 ILE 127	44.045 62.649 42.249 0.00 0.00	H
ATOM 1947 C ILE 127	48.006 62.028 45.125 0.00 0.00	C
ATOM 1948 O ILE 127	47.403 61.043 45.552 0.00 0.00	O
ATOM 1949 N ASP 128	48.281 63.083 45.869 0.00 0.00	N
ATOM 1950 H ASP 128	48.814 63.827 45.443 0.00 0.00	H
ATOM 1951 CA ASP 128	47.731 63.326 47.203 0.00 0.00	C
ATOM 1952 HA ASP 128	46.979 62.567 47.414 0.00 0.00	H
ATOM 1953 CB ASP 128	48.832 63.192 48.256 0.00 0.00	C
ATOM 1954 HB2 ASP 128	48.394 63.369 49.238 0.00 0.00	H
ATOM 1955 HB3 ASP 128	49.201 62.167 48.233 0.00 0.00	H
ATOM 1956 CG ASP 128	49.998 64.149 48.052 0.00 0.00	C
ATOM 1957 OD1 ASP 128	49.820 65.372 48.263 0.00 0.00	O
ATOM 1958 OD2 ASP 128	51.100 63.644 47.741 0.00 0.00	O
ATOM 1959 C ASP 128	46.994 64.671 47.294 0.00 0.00	C
ATOM 1960 O ASP 128	46.239 64.878 48.251 0.00 0.00	O
ATOM 1961 N ARG 129	47.144 65.545 46.286 0.00 0.00	N
ATOM 1962 H ARG 129	47.818 65.315 45.570 0.00 0.00	H
ATOM 1963 CA ARG 129	46.225 66.657 46.008 0.00 0.00	C
ATOM 1964 HA ARG 129	45.989 67.198 46.925 0.00 0.00	H
ATOM 1965 CB ARG 129	46.868 67.640 45.018 0.00 0.00	C
ATOM 1966 HB2 ARG 129	47.419 67.112 44.240 0.00 0.00	H
ATOM 1967 HB3 ARG 129	46.069 68.198 44.530 0.00 0.00	H
ATOM 1968 CG ARG 129	47.796 68.632 45.734 0.00 0.00	C
ATOM 1969 HG2 ARG 129	47.301 69.014 46.627 0.00 0.00	H
ATOM 1970 HG3 ARG 129	48.703 68.119 46.050 0.00 0.00	H
ATOM 1971 CD ARG 129	48.170 69.820 44.836 0.00 0.00	C
ATOM 1972 HD2 ARG 129	48.961 70.394 45.319 0.00 0.00	H
ATOM 1973 HD3 ARG 129	48.567 69.443 43.893 0.00 0.00	H
ATOM 1974 NE ARG 129	47.008 70.681 44.562 0.00 0.00	N
ATOM 1975 HE ARG 129	46.372 70.368 43.843 0.00 0.00	H
ATOM 1976 CZ ARG 129	46.672 71.816 45.163 0.00 0.00	C
ATOM 1977 NH1 ARG 129	47.344 72.345 46.158 0.00 0.00	N
ATOM 1978 1HH1 ARG 129	48.130 71.868 46.576 0.00 0.00	H
ATOM 1979 2HH1 ARG 129	47.066 73.244 46.525 0.00 0.00	H
ATOM 1980 NH2 ARG 129	45.607 72.457 44.736 0.00 0.00	N
ATOM 1981 1HH2 ARG 129	45.060 72.050 43.991 0.00 0.00	H
ATOM 1982 2HH2 ARG 129	45.370 73.348 45.149 0.00 0.00	H
ATOM 1983 C ARG 129	44.917 66.100 45.430 0.00 0.00	C
ATOM 1984 O ARG 129	44.947 65.395 44.421 0.00 0.00	O
ATOM 1985 N PHE 130	43.782 66.461 46.027 0.00 0.00	N
ATOM 1986 H PHE 130	43.855 67.083 46.819 0.00 0.00	H
ATOM 1987 CA PHE 130	42.418 66.085 45.625 0.00 0.00	C
ATOM 1988 HA PHE 130	42.252 66.395 44.593 0.00 0.00	H
ATOM 1989 CB PHE 130	42.207 64.566 45.644 0.00 0.00	C
ATOM 1990 HB2 PHE 130	41.150 64.368 45.466 0.00 0.00	H
ATOM 1991 HB3 PHE 130	42.747 64.124 44.807 0.00 0.00	H
ATOM 1992 CG PHE 130	42.595 63.837 46.915 0.00 0.00	C
ATOM 1993 CD1 PHE 130	43.798 63.108 46.978 0.00 0.00	C
ATOM 1994 HD1 PHE 130	44.468 63.083 46.131 0.00 0.00	H
ATOM 1995 CE1 PHE 130	44.136 62.404 48.152 0.00 0.00	C
ATOM 1996 HE1 PHE 130	45.043 61.820 48.195 0.00 0.00	H
ATOM 1997 CZ PHE 130	43.280 62.435 49.262 0.00 0.00	C
ATOM 1998 HZ PHE 130	43.549 61.900 50.162 0.00 0.00	H
ATOM 1999 CE2 PHE 130	42.077 63.158 49.200 0.00 0.00	C
ATOM 2000 HE2 PHE 130	41.403 63.173 50.044 0.00 0.00	H
[truncated: 4,635 more rows]
